# Supplementary material for: Extracorporeal Membrane Oxygenation for Pulmonary Embolism: A Systematic Review and Meta-Analysis
Source: MDPI journal article supplement (doi:10.3390/jcm13010064), 2023-12-22
Supplement: s1 [file s1]

# **Extracorporeal Membrane Oxygenation for Pulmonary Embolism: A Systematic Review and Meta-Analysis**

*Supplementary appendix*

Jonathan Jia En Boey,  
Ujwal Dhundi,  
Ryan Ruiyang Ling,  
John Keong Chiew,  
Nicole Chui-Jiet Fong,  
Ying Chen,  
Lukas Hobohm,  
Priya Nair,  
Roberto Lorusso,  
Graeme MacLaren,  
Kollengode Ramanathan.

---

## **Corresponding author**

Kollengode Ramanathan,  
Cardiothoracic Intensive Care Unit, National University Heart Centre, National University Hospital,  
Level 9, 1E Kent Ridge Road, Singapore 119228  
Email: [surrkr@nus.edu.sg](mailto:surrkr@nus.edu.sg)

## Table of Contents

|                                                                                                                                                                          |    |
|--------------------------------------------------------------------------------------------------------------------------------------------------------------------------|----|
| <b>Figure S1.</b> Funnel plot and trim-and-fill analysis of mortality for patients receiving extracorporeal membrane oxygenation for high-risk pulmonary embolism .....  | 3  |
| <b>Figure S2.</b> Pooled risk ratio comparing patients receiving ECMO vs no ECMO for high-risk pulmonary embolism without Hobohm 2022 .....                              | 4  |
| <b>Figure S3.</b> Subgroup analysis of mortality for patients receiving extracorporeal membrane oxygenation for high-risk pulmonary embolism, stratified by region ..... | 5  |
| <b>Figure S4.</b> Pooled mortality amongst patients receiving extracorporeal membrane oxygenation for high-risk pulmonary embolism stratified by study type. ....        | 6  |
| <b>Figure S5.</b> Pooled duration of ECMO support amongst patients receiving extracorporeal membrane oxygenation for high-risk pulmonary embolism .....                  | 7  |
| <b>Figure S6.</b> Pooled intensive care unit length of stay amongst patients receiving extracorporeal membrane oxygenation for high-risk pulmonary embolism .....        | 7  |
| <b>Figure S7.</b> Pooled hospital length of stay amongst patients receiving extracorporeal membrane oxygenation for high-risk pulmonary embolism.....                    | 8  |
| <b>Figure S8.</b> Pooled duration of mechanical ventilation amongst patients receiving extracorporeal membrane oxygenation for high-risk pulmonary embolism .....        | 8  |
| <b>Figure S9.</b> Pooled incidence of haemorrhagic complications amongst patients receiving extracorporeal membrane oxygenation for high-risk pulmonary embolism .....   | 9  |
| <b>Table S1.</b> Preferred Reporting Items for Systematic reviews and Meta-Analyses (PRISMA) 2020 Checklist .....                                                        | 10 |
| <b>Table S2.</b> Search strategy for databases.....                                                                                                                      | 13 |
| <b>Table S3.</b> Data collection template .....                                                                                                                          | 14 |
| <b>Table S4a.</b> Demographics and outcomes of included studies .....                                                                                                    | 16 |
| <b>Table S4b.</b> Risk factors .....                                                                                                                                     | 19 |
| <b>Table S4c.</b> Definitive therapies for haemodynamically unstable pulmonary embolism.....                                                                             | 21 |
| <b>Table S4d.</b> Details of pulmonary embolism .....                                                                                                                    | 22 |
| <b>Table S4e.</b> Patient characteristics at admission for patients with ECMO.....                                                                                       | 24 |
| <b>Table S4f.</b> Patient characteristics at admission for patients without ECMO .....                                                                                   | 26 |
| <b>Table S4g.</b> ECMO Characteristics.....                                                                                                                              | 27 |
| <b>Table S4h.</b> Subgroup demographics by region.....                                                                                                                   | 29 |
| <b>Table S5.</b> Joanna Briggs Institute Checklist .....                                                                                                                 | 30 |
| <b>Table S6.</b> Grading of Recommendations, Assessment, Development, and Evaluations .....                                                                              | 32 |
| <b>Table S7.</b> Summary of subgroup and meta-regression analysis.....                                                                                                   | 34 |
| <b>Table S8:</b> Summary of secondary outcomes .....                                                                                                                     | 36 |
| <b>Table S9:</b> Complications reported by included studies .....                                                                                                        | 37 |

**Figure S1.** Funnel plot and trim-and-fill analysis of mortality for patients receiving extracorporeal membrane oxygenation for high-risk pulmonary embolism [9,10,26-62]

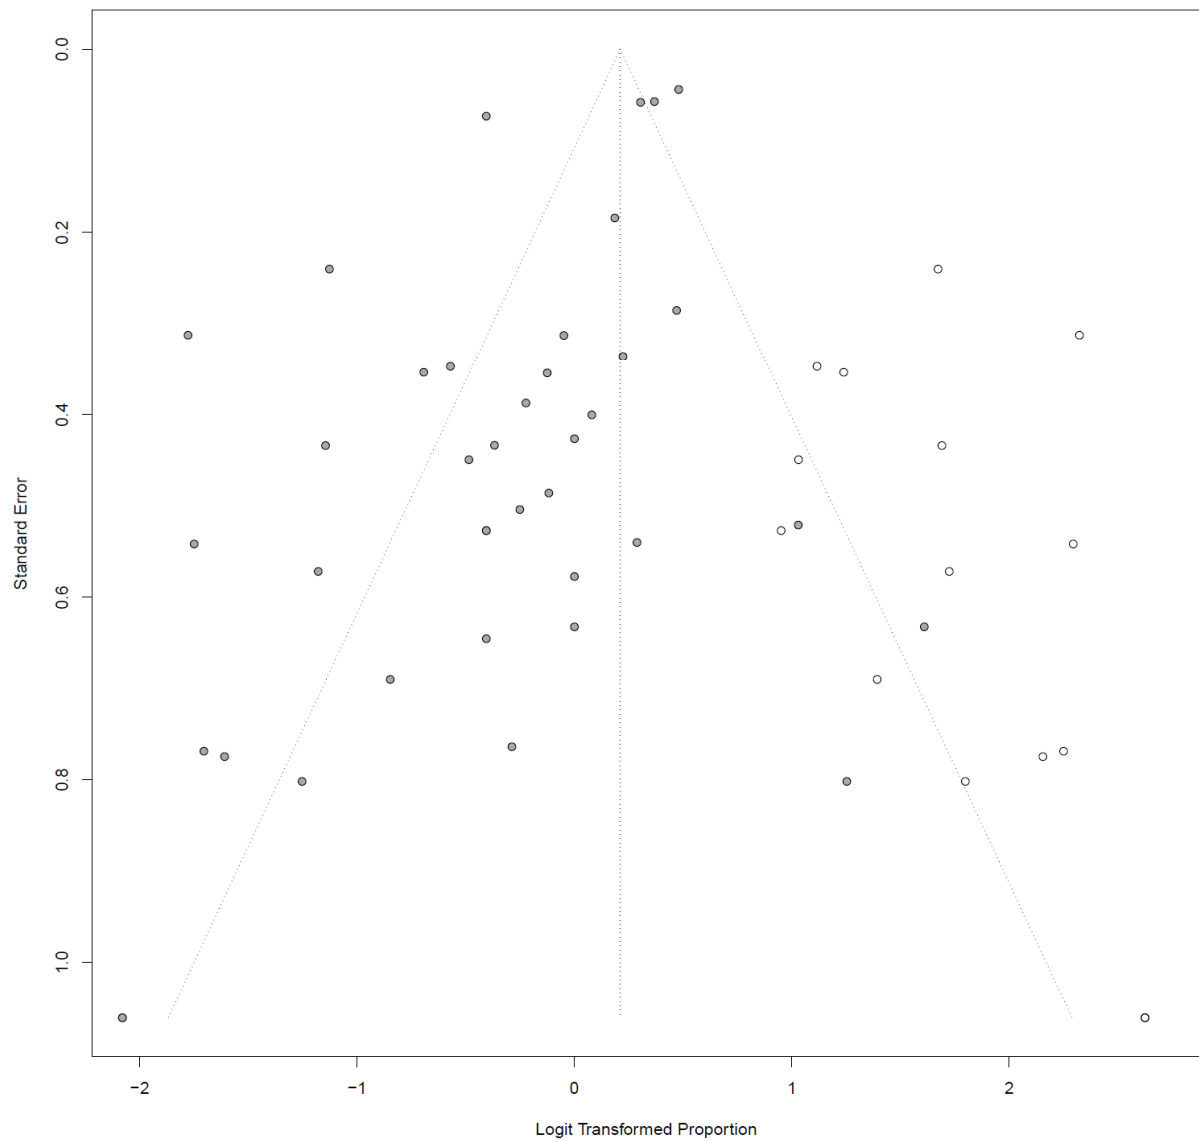

**Figure S2.** Pooled risk ratio comparing patients receiving ECMO vs no ECMO for high-risk pulmonary embolism without Hobohm 2022 [29,31,37,38,40,41,46,58,60,62]

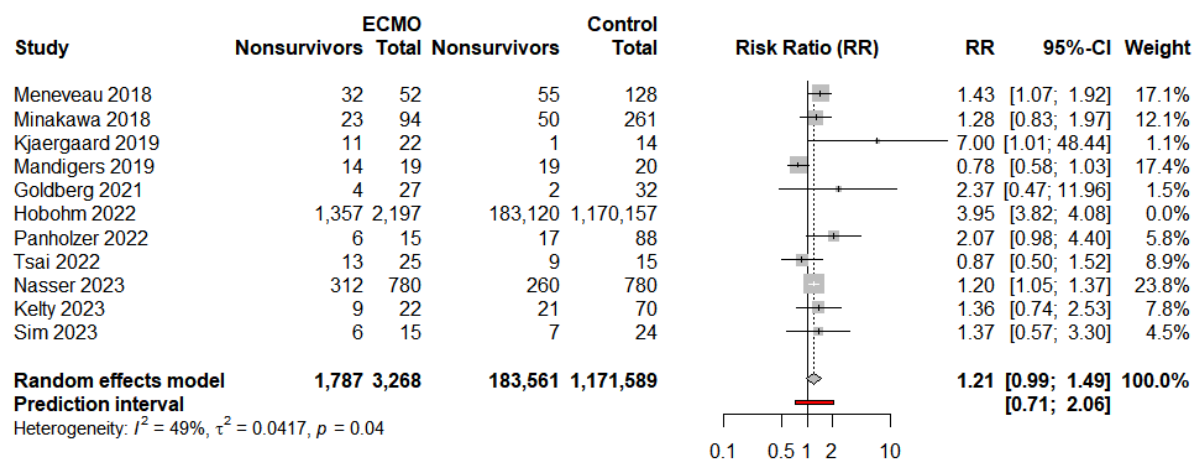

**Figure S3.** Subgroup analysis of mortality for patients receiving extracorporeal membrane oxygenation for high-risk pulmonary embolism, stratified by region [9,10,26-62]

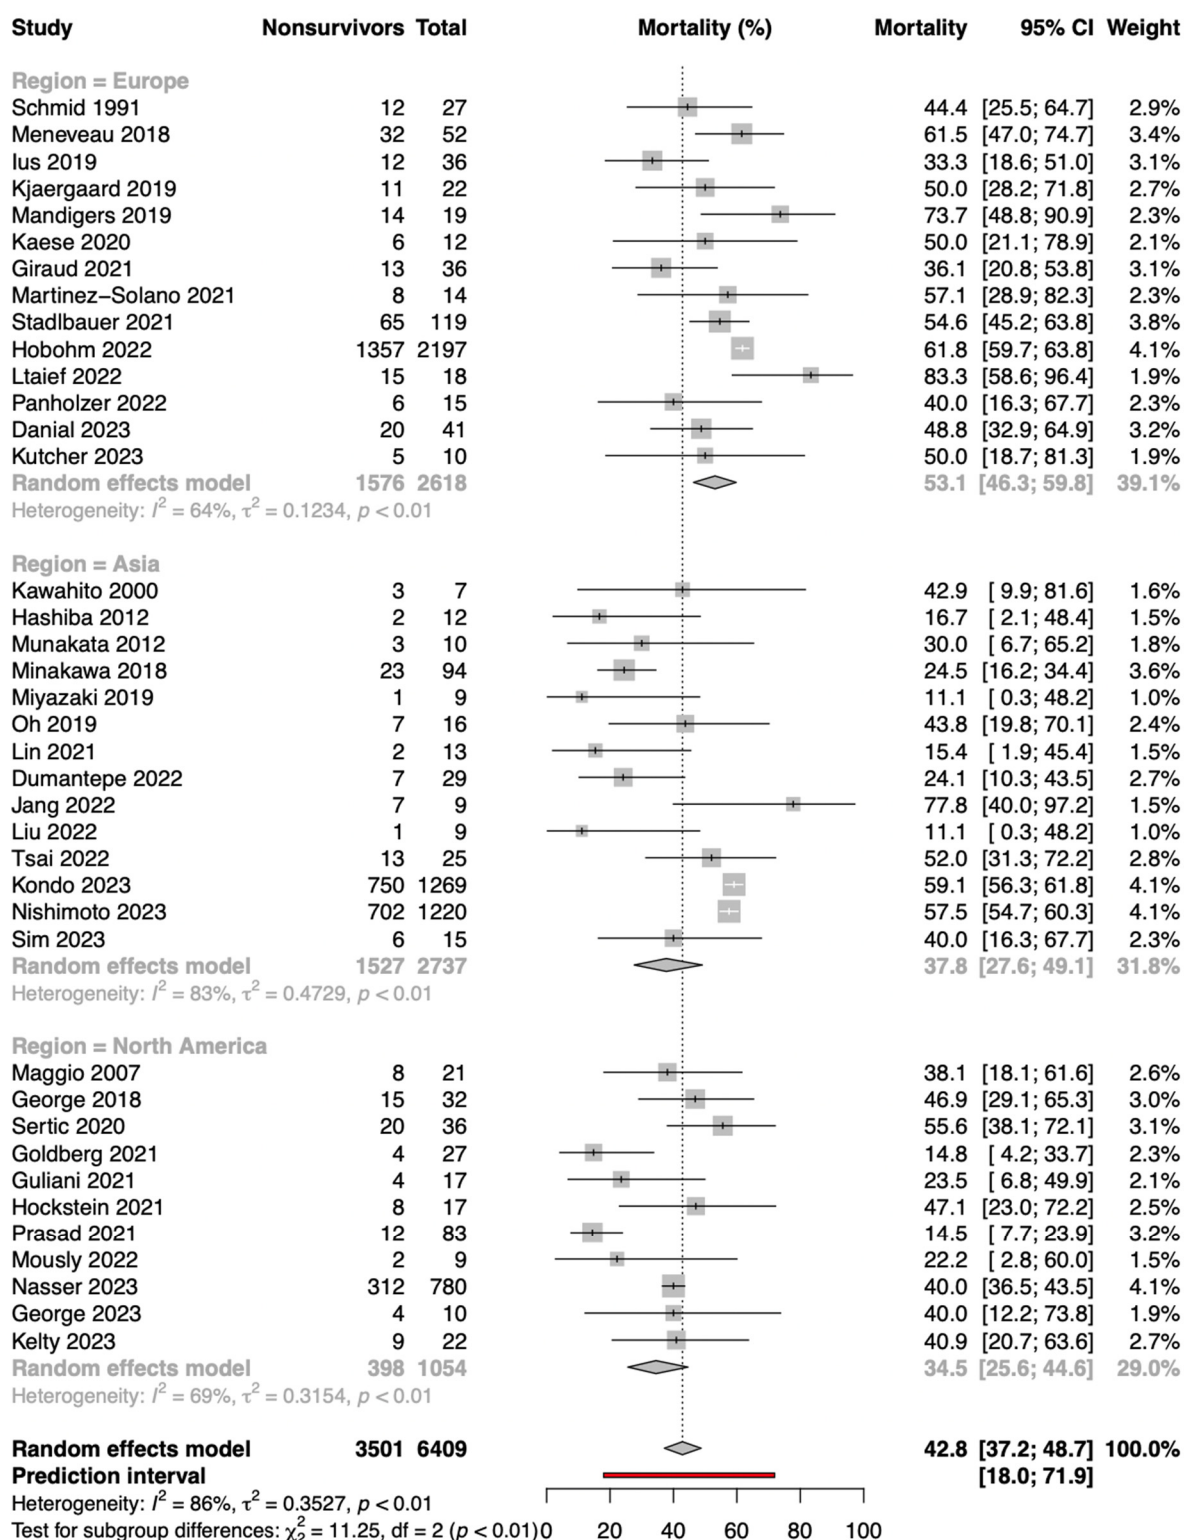

**Figure S4.** Pooled mortality amongst patients receiving extracorporeal membrane oxygenation for high-risk pulmonary embolism stratified by study type [9,10,26-62]

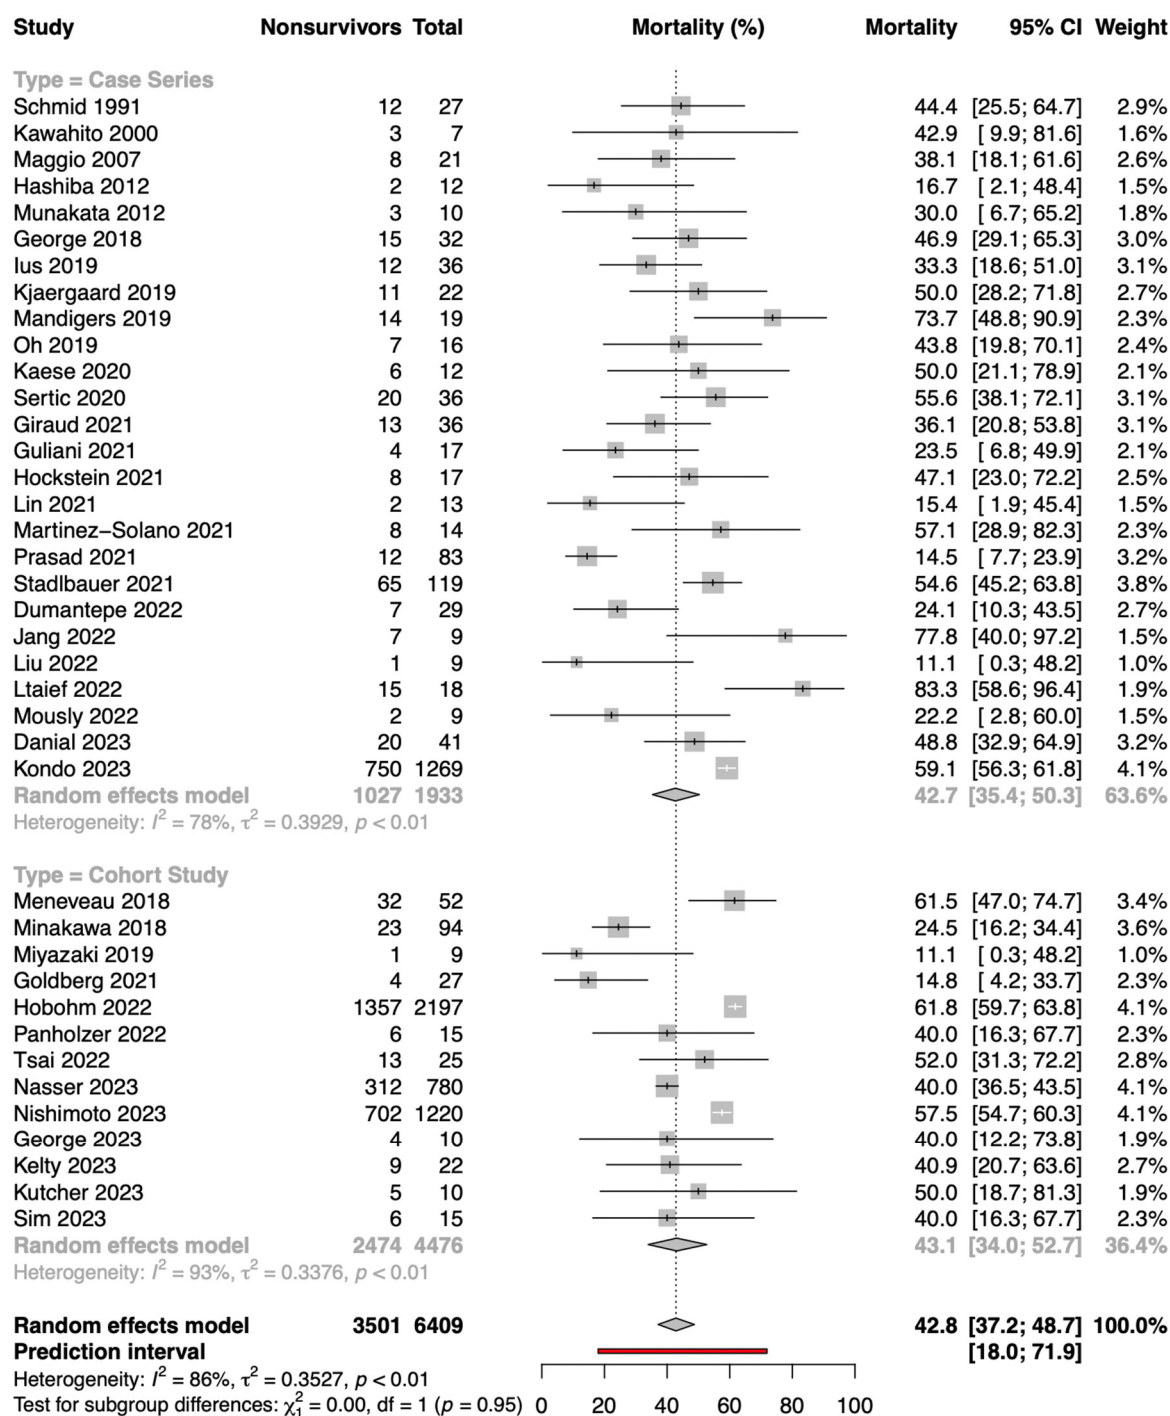

**Figure S5.** Pooled duration of ECMO support amongst patients receiving extracorporeal membrane oxygenation for high-risk pulmonary embolism [9,10,26,28,30,33-37,40,42-45,47,49,50,52-57,59,61,62]

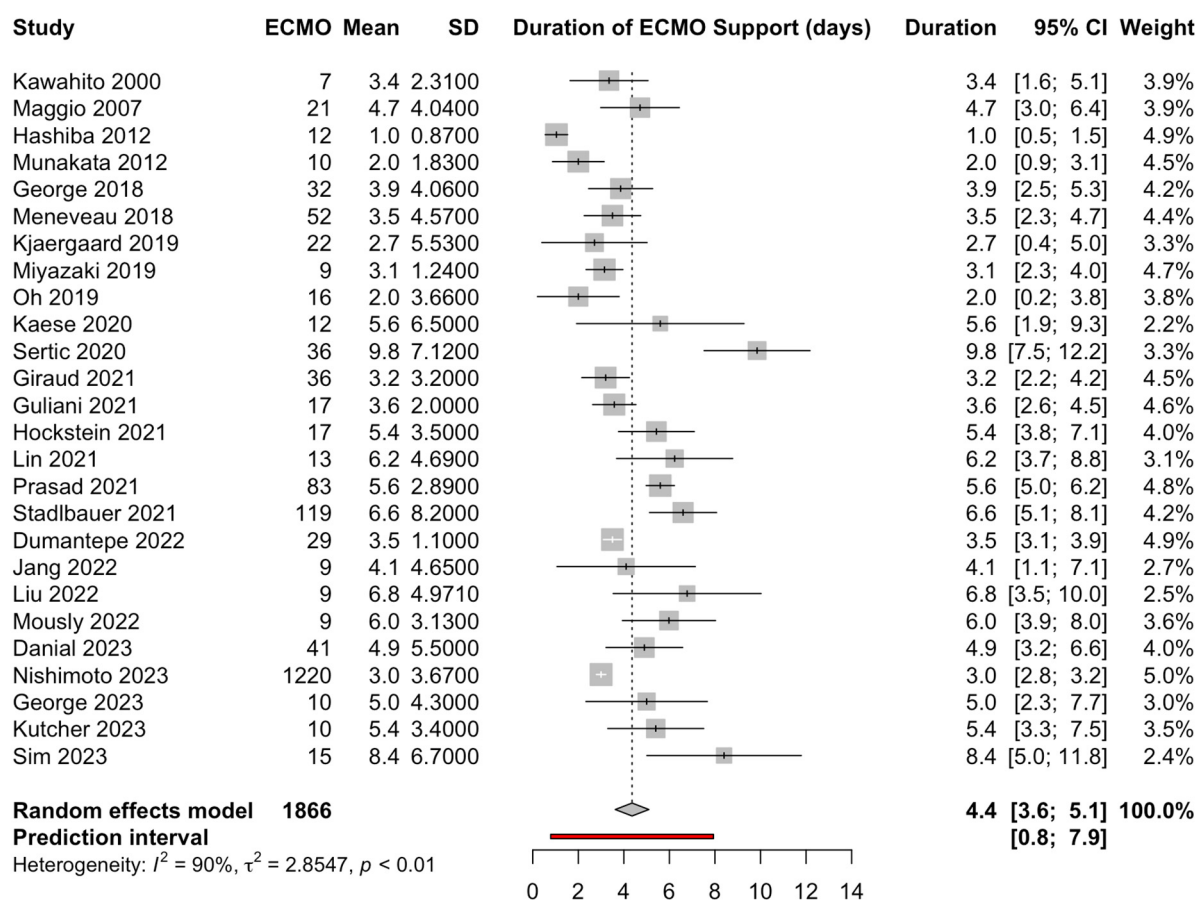

**Figure S6.** Pooled intensive care unit length of stay amongst patients receiving extracorporeal membrane oxygenation for high-risk pulmonary embolism [9,34,36,39,42,44-50,52,53,55,56,59,60,62]

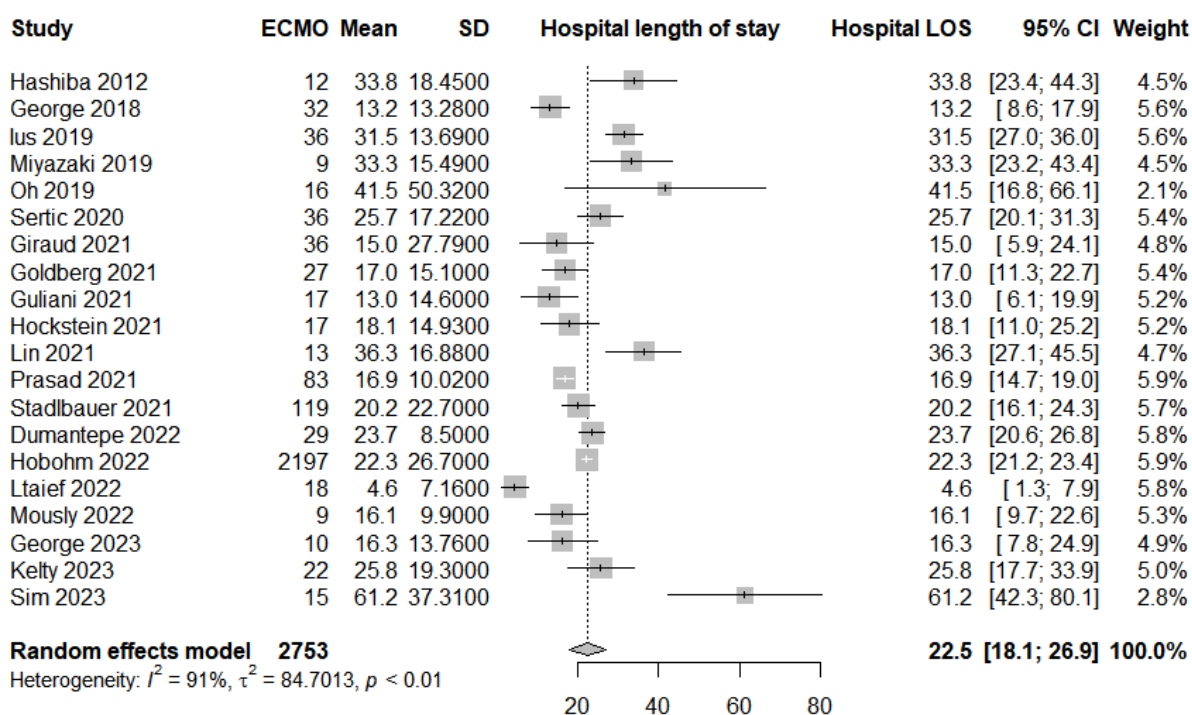

**Figure S7.** Pooled hospital length of stay amongst patients receiving extracorporeal membrane oxygenation for high-risk pulmonary embolism [9,34,36,39,42,44,-50,52,53,55,56,59,60,62]

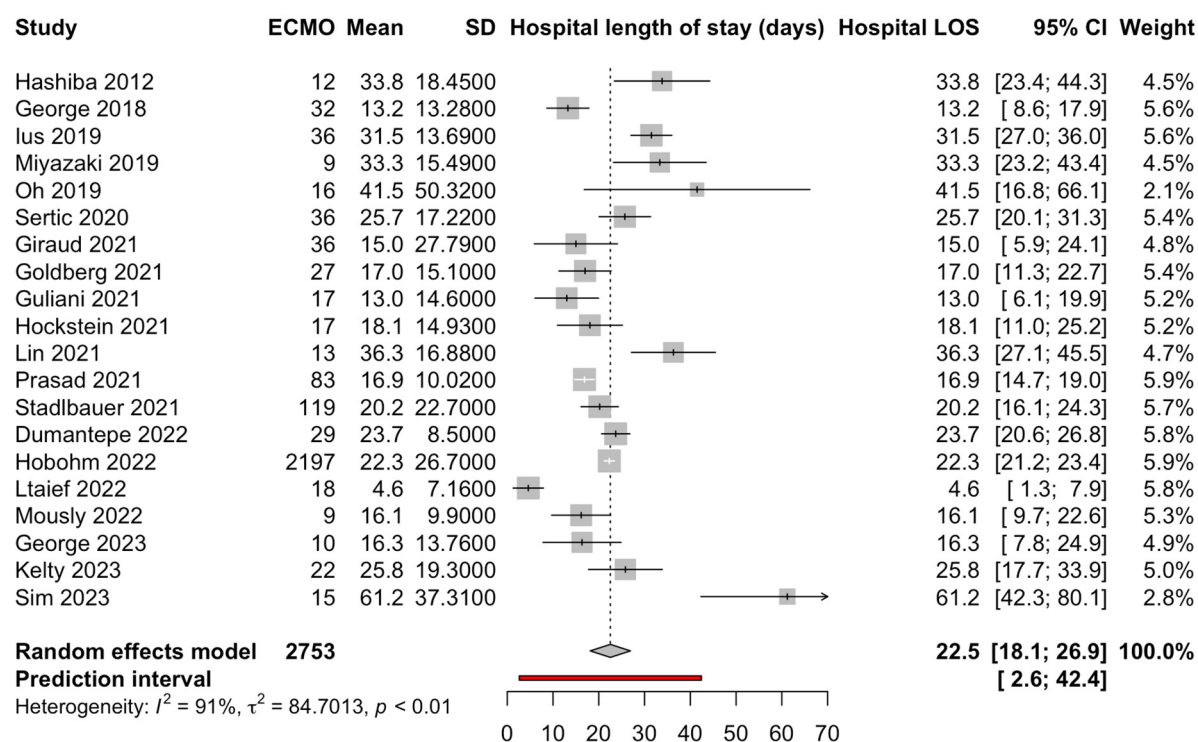

**Figure S8.** Pooled duration of mechanical ventilation amongst patients receiving extracorporeal membrane oxygenation for high-risk pulmonary embolism [45,49,52,55,57]

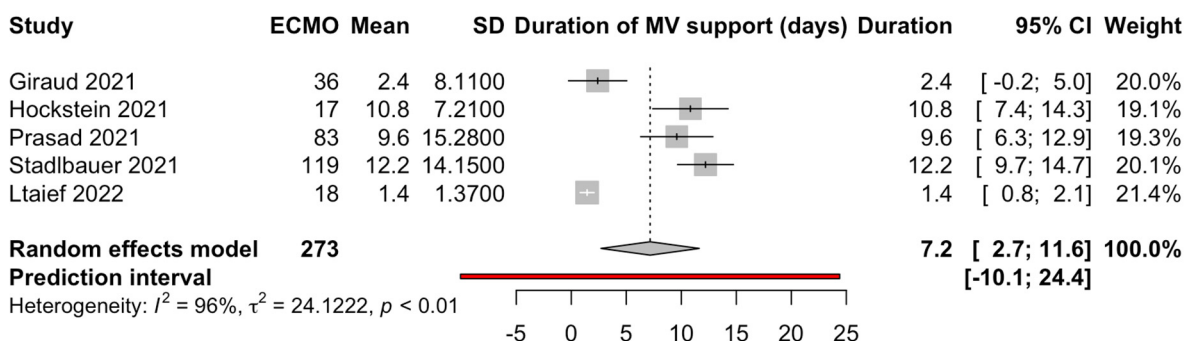

**Figure S9.** Pooled incidence of haemorrhagic complications amongst patients receiving extracorporeal membrane oxygenation for high-risk pulmonary embolism [9,10,26,28-31,36,37,39,41-47,49,50,52-55,58,62]

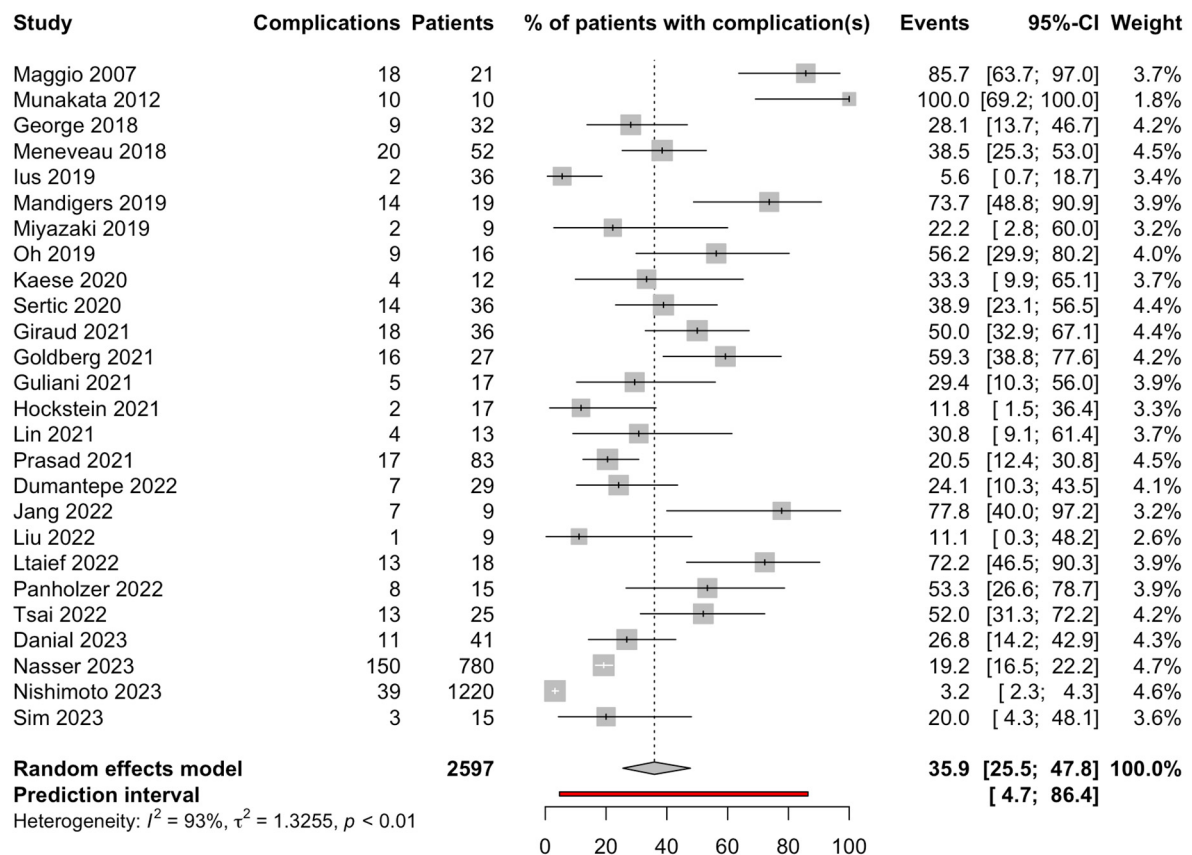

**Table S1.** Preferred Reporting Items for Systematic reviews and Meta-Analyses (PRISMA) 2020 Checklist

| Section and Topic       | Item # | Checklist item                                                                                                                                                                                                                                                                                       | Location where item is reported |
|-------------------------|--------|------------------------------------------------------------------------------------------------------------------------------------------------------------------------------------------------------------------------------------------------------------------------------------------------------|---------------------------------|
| <b>TITLE</b>            |        |                                                                                                                                                                                                                                                                                                      |                                 |
| Title                   | 1      | Identify the report as a systematic review.                                                                                                                                                                                                                                                          | Page 1                          |
| <b>ABSTRACT</b>         |        |                                                                                                                                                                                                                                                                                                      |                                 |
| Abstract                | 2      | See the PRISMA 2020 for Abstracts checklist.                                                                                                                                                                                                                                                         | Page 3                          |
| <b>INTRODUCTION</b>     |        |                                                                                                                                                                                                                                                                                                      |                                 |
| Rationale               | 3      | Describe the rationale for the review in the context of existing knowledge.                                                                                                                                                                                                                          | Page 4                          |
| Objectives              | 4      | Provide an explicit statement of the objective(s) or question(s) the review addresses.                                                                                                                                                                                                               | Page 4                          |
| <b>METHODS</b>          |        |                                                                                                                                                                                                                                                                                                      |                                 |
| Eligibility criteria    | 5      | Specify the inclusion and exclusion criteria for the review and how studies were grouped for the syntheses.                                                                                                                                                                                          | Page 4-5                        |
| Information sources     | 6      | Specify all databases, registers, websites, organisations, reference lists and other sources searched or consulted to identify studies. Specify the date when each source was last searched or consulted.                                                                                            | Page 4                          |
| Search strategy         | 7      | Present the full search strategies for all databases, registers and websites, including any filters and limits used.                                                                                                                                                                                 | Table S2                        |
| Selection process       | 8      | Specify the methods used to decide whether a study met the inclusion criteria of the review, including how many reviewers screened each record and each report retrieved, whether they worked independently, and if applicable, details of automation tools used in the process.                     | Page 5                          |
| Data collection process | 9      | Specify the methods used to collect data from reports, including how many reviewers collected data from each report, whether they worked independently, any processes for obtaining or confirming data from study investigators, and if applicable, details of automation tools used in the process. | Page 5                          |
| Data items              | 10a    | List and define all outcomes for which data were sought. Specify whether all results that were compatible with each outcome domain in each study were sought (e.g. for all measures, time points, analyses), and if not, the methods used to decide which results to collect.                        | Table S3                        |
|                         | 10b    | List and define all other variables for which data were sought (e.g. participant and intervention characteristics, funding sources). Describe any assumptions made about any missing or unclear information.                                                                                         | Table S3                        |
| Study risk of bias      | 11     | Specify the methods used to assess risk of bias in the included studies, including details of the tool(s) used, how many reviewers assessed                                                                                                                                                          | Page 5, Table                   |

|                               |     |                                                                                                                                                                                                                                                             |                    |
|-------------------------------|-----|-------------------------------------------------------------------------------------------------------------------------------------------------------------------------------------------------------------------------------------------------------------|--------------------|
| assessment                    |     | each study and whether they worked independently, and if applicable, details of automation tools used in the process.                                                                                                                                       | S5                 |
| Effect measures               | 12  | Specify for each outcome the effect measure(s) (e.g. risk ratio, mean difference) used in the synthesis or presentation of results.                                                                                                                         | Page 5-6           |
| Synthesis methods             | 13a | Describe the processes used to decide which studies were eligible for each synthesis (e.g. tabulating the study intervention characteristics and comparing against the planned groups for each synthesis (item #5)).                                        | Page 5-6           |
|                               | 13b | Describe any methods required to prepare the data for presentation or synthesis, such as handling of missing summary statistics, or data conversions.                                                                                                       | Page 5-6           |
|                               | 13c | Describe any methods used to tabulate or visually display results of individual studies and syntheses.                                                                                                                                                      | Page 5-6, Table S4 |
|                               | 13d | Describe any methods used to synthesize results and provide a rationale for the choice(s). If meta-analysis was performed, describe the model(s), method(s) to identify the presence and extent of statistical heterogeneity, and software package(s) used. | Page 5-6           |
|                               | 13e | Describe any methods used to explore possible causes of heterogeneity among study results (e.g. subgroup analysis, meta-regression).                                                                                                                        | Page 5-6           |
|                               | 13f | Describe any sensitivity analyses conducted to assess robustness of the synthesized results.                                                                                                                                                                | Page 5-6           |
| Reporting bias assessment     | 14  | Describe any methods used to assess risk of bias due to missing results in a synthesis (arising from reporting biases).                                                                                                                                     | Table S5           |
| Certainty assessment          | 15  | Describe any methods used to assess certainty (or confidence) in the body of evidence for an outcome.                                                                                                                                                       | Table S6           |
| <b>RESULTS</b>                |     |                                                                                                                                                                                                                                                             |                    |
| Study selection               | 16a | Describe the results of the search and selection process, from the number of records identified in the search to the number of studies included in the review, ideally using a flow diagram.                                                                | Page 6-7, Figure 1 |
|                               | 16b | Cite studies that might appear to meet the inclusion criteria, but which were excluded, and explain why they were excluded.                                                                                                                                 | Page 6-7           |
| Study characteristics         | 17  | Cite each included study and present its characteristics.                                                                                                                                                                                                   | Page 7, Table S4   |
| Risk of bias in studies       | 18  | Present assessments of risk of bias for each included study.                                                                                                                                                                                                | Table S5           |
| Results of individual studies | 19  | For all outcomes, present, for each study: (a) summary statistics for each group (where appropriate) and (b) an effect estimate and its precision (e.g. confidence/credible interval), ideally using structured tables or plots.                            | Page 6-9           |

|                                                |     |                                                                                                                                                                                                                                                                                      |           |
|------------------------------------------------|-----|--------------------------------------------------------------------------------------------------------------------------------------------------------------------------------------------------------------------------------------------------------------------------------------|-----------|
| Results of syntheses                           | 20a | For each synthesis, briefly summarise the characteristics and risk of bias among contributing studies.                                                                                                                                                                               | Table S6  |
|                                                | 20b | Present results of all statistical syntheses conducted. If meta-analysis was done, present for each the summary estimate and its precision (e.g. confidence/credible interval) and measures of statistical heterogeneity. If comparing groups, describe the direction of the effect. | Page 6-9  |
|                                                | 20c | Present results of all investigations of possible causes of heterogeneity among study results.                                                                                                                                                                                       | Page 6-9  |
|                                                | 20d | Present results of all sensitivity analyses conducted to assess the robustness of the synthesized results.                                                                                                                                                                           | Page 6-9  |
| Reporting biases                               | 21  | Present assessments of risk of bias due to missing results (arising from reporting biases) for each synthesis assessed.                                                                                                                                                              | Table S6  |
| Certainty of evidence                          | 22  | Present assessments of certainty (or confidence) in the body of evidence for each outcome assessed.                                                                                                                                                                                  | Table S6  |
| <b>DISCUSSION</b>                              |     |                                                                                                                                                                                                                                                                                      |           |
| Discussion                                     | 23a | Provide a general interpretation of the results in the context of other evidence.                                                                                                                                                                                                    | Page 9-12 |
|                                                | 23b | Discuss any limitations of the evidence included in the review.                                                                                                                                                                                                                      | Page 9-12 |
|                                                | 23c | Discuss any limitations of the review processes used.                                                                                                                                                                                                                                | Page 9-12 |
|                                                | 23d | Discuss implications of the results for practice, policy, and future research.                                                                                                                                                                                                       | Page 9-12 |
| <b>OTHER INFORMATION</b>                       |     |                                                                                                                                                                                                                                                                                      |           |
| Registration and protocol                      | 24a | Provide registration information for the review, including register name and registration number, or state that the review was not registered.                                                                                                                                       | Page 4    |
|                                                | 24b | Indicate where the review protocol can be accessed, or state that a protocol was not prepared.                                                                                                                                                                                       | Page 4    |
|                                                | 24c | Describe and explain any amendments to information provided at registration or in the protocol.                                                                                                                                                                                      | Page 5-6  |
| Support                                        | 25  | Describe sources of financial or non-financial support for the review, and the role of the funders or sponsors in the review.                                                                                                                                                        | Page 5    |
| Competing interests                            | 26  | Declare any competing interests of review authors.                                                                                                                                                                                                                                   | Page 13   |
| Availability of data, code and other materials | 27  | Report which of the following are publicly available and where they can be found: template data collection forms; data extracted from included studies; data used for all analyses; analytic code; any other materials used in the review.                                           | Table S3  |

From: Page MJ, McKenzie JE, Bossuyt PM, Boutron I, Hoffmann TC, Mulrow CD, et al. The PRISMA 2020 statement: an updated guideline for reporting systematic reviews. BMJ 2021;372:n71. doi: 10.1136/bmj.n71

**Table S2.** Search strategy for databases**MEDLINE via PubMed**

| No. | Search                                                                                                                                                                                                                                                                                                                                                                                                                                   | Results |
|-----|------------------------------------------------------------------------------------------------------------------------------------------------------------------------------------------------------------------------------------------------------------------------------------------------------------------------------------------------------------------------------------------------------------------------------------------|---------|
| 1   | ((("Pulmonary Embolism"[MeSH Terms]) OR (pulmonary embol*[Title/Abstract] OR PE[title/abstract]))<br>and<br>(("Extracorporeal Membrane Oxygenation"[Mesh]) OR ((Extracor*[Title/Abstract] OR extra-cor*[Title/Abstract]) and ((membra*[Title/Abstract] AND oxygen*[Title/Abstract]) OR (life support[Title/Abstract] OR lung support[Title/Abstract] OR circulat*[Title/Abstract])))) OR (ecls[Title/Abstract] OR ecmo[Title/Abstract])) | 870     |

**EMBASE via Ovid**

| No. | Search                                                                                                                                                                                                                                                       | Results |
|-----|--------------------------------------------------------------------------------------------------------------------------------------------------------------------------------------------------------------------------------------------------------------|---------|
| 1   | ((veno-arterial ECMO/ or arterio-venous ECMO/ or veno-venous ECMO/) OR (extracorporeal oxygenation/) OR (((Extracor* or extra-cor*) and (membra* oxygen* or life support or lung support or circulat*)).ti,ab) OR ((ECLS or ECMO).ab,ti)) AND lung embolism/ | 2475    |

**Cochrane Library**

| No. | Search                                                                                                                 | Results |
|-----|------------------------------------------------------------------------------------------------------------------------|---------|
| 1   | MeSH descriptor: [Extracorporeal Membrane Oxygenation] explode all trees                                               | 124     |
| 2   | ((Extracor* OR Extra-cor*) AND ((membra* oxygen*) OR life support OR lung support OR circulat*) OR ECLS OR ECMO):ti,ab |         |
| 3   | MeSH descriptor: [Pulmonary Embolism] explode all trees                                                                |         |
| 4   | (Pulmonary AND Embol* OR PE):ti,ab                                                                                     |         |
| 5   | (1 OR 2) AND (3 OR 4)                                                                                                  |         |

**Scopus**

| No. | Search                                                                                                                                                                                          | Results |
|-----|-------------------------------------------------------------------------------------------------------------------------------------------------------------------------------------------------|---------|
| 1   | TITLE-ABS ( ( extracor* OR extra-cor* ) AND ( ( membra* AND oxygen* ) OR life AND support OR lung AND support OR circulat* ) OR ecls OR ecmo ) AND TITLE-ABS ( ( pulmonary AND embol* ) OR pe ) | 415     |

\* corresponds the use of a wildcard search in the above search strategies

**Table S3.** Data collection template

|                                                                                      |                                                               |
|--------------------------------------------------------------------------------------|---------------------------------------------------------------|
| <b>Study Characteristics</b>                                                         | Authors                                                       |
|                                                                                      | Title                                                         |
|                                                                                      | Year of Publication                                           |
|                                                                                      | Country / Hospital                                            |
|                                                                                      | Duration of Study                                             |
|                                                                                      | Inclusion/exclusion criteria                                  |
|                                                                                      | Sample Size                                                   |
| <b>Patient Demographics</b>                                                          | Age                                                           |
|                                                                                      | Number of male patients                                       |
|                                                                                      | Ethnicity / Race                                              |
| <b>Number and mortality of patients receiving ECMO and any adjuvant treatment</b>    | Bridged to surgical embolectomy with ECMO                     |
|                                                                                      | Bridged to catheter-directed therapy with ECMO                |
|                                                                                      | Bridged to thrombolysis with ECMO                             |
|                                                                                      | Bridged to recovery with ECMO post-surgical embolectomy       |
|                                                                                      | Bridged to recovery with ECMO after catheter-directed therapy |
|                                                                                      | Bridged to recovery with ECMO post-thrombolysis               |
|                                                                                      | ECMO Only                                                     |
|                                                                                      | Others                                                        |
| <b>Number and mortality of patients of control groups and any adjuvant treatment</b> | Surgical embolectomy                                          |
|                                                                                      | Catheter-directed therapy                                     |
|                                                                                      | Thrombolysis                                                  |
|                                                                                      | Others                                                        |
| <b>Comorbidities</b>                                                                 | >60yo                                                         |
|                                                                                      | Hypertension                                                  |
|                                                                                      | Diabetes Mellitus                                             |
|                                                                                      | Hypersensitivity lung disease                                 |
|                                                                                      | Obesity                                                       |
|                                                                                      | COPD/Asthma                                                   |
|                                                                                      | Coronary Artery Disease                                       |
|                                                                                      | Smoking                                                       |
|                                                                                      | Deep venous thrombosis or history of deep venous thrombosis   |
|                                                                                      | Malignancy                                                    |
|                                                                                      | Immobility                                                    |
|                                                                                      | Recent operation less than one month ago                      |
| <b>Pulmonary Embolism Characteristics</b>                                            | Location                                                      |
|                                                                                      | Type                                                          |
|                                                                                      | History of pulmonary embolism                                 |
| <b>Pre-ECMO characteristics</b>                                                      | Indication                                                    |
|                                                                                      | Organ failure                                                 |
|                                                                                      | Organ failure scores (APACHE, SOFA, SAPS, LIS)                |
|                                                                                      | PaO <sub>2</sub> /FiO <sub>2</sub> ratio                      |
|                                                                                      | PO <sub>2</sub>                                               |
|                                                                                      | PCO <sub>2</sub>                                              |
|                                                                                      | FiO <sub>2</sub>                                              |
|                                                                                      | acute respiratory distress syndrome                           |
|                                                                                      | pH                                                            |
|                                                                                      | lactate                                                       |
|                                                                                      | D-dimer                                                       |
|                                                                                      | fibrinogen                                                    |
|                                                                                      | IL-6                                                          |
|                                                                                      | white blood cell count                                        |
|                                                                                      | time from mechanical ventilation to ECMO                      |
| <b>ECMO characteristics</b>                                                          | Number of VV-ECMO                                             |
|                                                                                      | Number of VA-ECMO                                             |
|                                                                                      | Cannulation site                                              |
| <b>Ventilatory parameters</b>                                                        | Tidal volume                                                  |
|                                                                                      | Peak inspiratory pressure                                     |
|                                                                                      | Plateau pressure                                              |
|                                                                                      | Driving pressure                                              |
|                                                                                      | Mean arterial pressure                                        |

|                 |                                            |
|-----------------|--------------------------------------------|
| <b>Outcomes</b> | Respiratory rate                           |
|                 | Positive end-expiratory pressure           |
|                 | Mortality                                  |
|                 | Survivors (short - 30 days, long - >3mths) |
|                 | ICU length of stay                         |
|                 | Hospital length of stay                    |
|                 | Duration of mechanical ventilation         |
|                 | Duration on ECMO                           |
|                 | Complications while on ECMO                |

**Table S4a.** Demographics and outcomes of included studies [9,10,26-62]

| Author          | Country     | No. of patients | Ethnicity  | Patients with ECMO |                    |               |               |                         |                       |                           |                                | Patients without ECMO |           |      |               |
|-----------------|-------------|-----------------|------------|--------------------|--------------------|---------------|---------------|-------------------------|-----------------------|---------------------------|--------------------------------|-----------------------|-----------|------|---------------|
|                 |             |                 |            | Sample Size        | Mortality (number) | Male (number) | Age (yrs)     | Duration of ECMO (days) | Duration of MV (days) | Length of ICU stay (days) | Length of hospital stay (days) | Sample Size           | Mortality | Male | Age (yrs)     |
| Schmid 1991     | Germany     | 27              |            | 27                 | 12                 | 17            | 50 ± 14.51    |                         |                       |                           |                                |                       |           |      |               |
| Kawahito 2000   | Japan       | 7               | 7 Japanese | 7                  | 3                  | 2             | 61 ± 16       | 3.35 ± 2.31             |                       |                           |                                |                       |           |      |               |
| Maggio 2007     | USA         | 21              |            | 21                 | 8                  | 10            | 40.52 ± 17.01 | 4.71 ± 4.04             |                       |                           |                                |                       |           |      |               |
| Hashiba 2012    | Japan       | 12              |            | 12                 | 2                  | 4             | 65.2 ± 15.7   | 1.04 ± 0.87             |                       |                           | 33.83 ± 18.45                  |                       |           |      |               |
| Munakata 2012   | Japan       | 10              |            | 10                 | 3                  | 2             | 57.75 ± 20.47 | 2 ± 1.83                |                       |                           |                                |                       |           |      |               |
| George 2018     | USA         | 32              |            | 32                 | 15                 | 17            | 56.13 ± 5.89  | 3.86 ± 4.06             |                       | 6.78 ± 7.22               | 13.25 ± 13.28                  |                       |           |      |               |
| Meneveau 2018   | France      | 180             |            | 52                 | 32                 | 27            | 47.6 ± 15     | 3.5 ± 4.57              |                       | 7.17 ± 10.9               |                                | 128                   | 55        | 69   | 64 ± 15       |
| Minakawa 2018   | Japan       | 355             |            | 94                 | 23                 |               |               |                         |                       |                           |                                | 261                   | 50        |      |               |
| Ius 2019        | Germany     | 36              |            | 36                 | 12                 | 23            | 52.25 ± 14.4  |                         |                       | 15.5 ± 6.61               | 31.5 ± 13.69                   |                       |           |      |               |
| Kjaergaard 2019 | Denmark     | 36              |            | 22                 | 11                 | 10            | 55 ± 15.53    | 2.71 ± 5.53             |                       |                           |                                | 14                    | 1         | 7    | 59.29 ± 15.17 |
| Mandigers 2019  | Netherlands | 39              |            | 19                 | 14                 | 8             | 43.33 ± 23.94 |                         |                       |                           |                                | 20                    | 19        | 8    | 55.33 ± 14.42 |
| Miyazaki 2019   | Japan       | 9               |            | 9                  | 1                  | 4             | 51.5 ± 15.49  | 3.15 ± 1.24             |                       | 8.67 ± 2.69               | 33.33 ± 15.49                  |                       |           |      |               |
| Oh 2019         | South Korea | 16              |            | 16                 | 7                  | 6             | 53.33 ± 26.82 | 2 ± 3.66                |                       | 11.35 ± 13.34             | 41.48 ± 50.32                  |                       |           |      |               |
| Kaese 2020      | Germany     | 12              |            | 12                 | 6                  | 9             | 44.2 ± 11.9   | 5.6 ± 6.5               |                       | 22.4 ± 23                 |                                |                       |           |      |               |

|                      |             |         |                                                                  |      |      |      |               |             |              |               |               |         |        |        |               |
|----------------------|-------------|---------|------------------------------------------------------------------|------|------|------|---------------|-------------|--------------|---------------|---------------|---------|--------|--------|---------------|
| Sertic 2020          | USA         | 36      |                                                                  | 36   | 20   | 16   | 51.36 ± 14.05 | 9.85 ± 7.12 |              | 18.98 ± 12.56 | 25.7 ± 17.22  |         |        |        |               |
| Giraud 2021          | Switzerland | 36      |                                                                  | 36   | 13   | 27   | 57 ± 17.76    | 3.2 ± 3.2   | 2.4 ± 8.11   | 8.7 ± 6.18    | 15 ± 27.79    |         |        |        |               |
| Guliani 2021         | New Mexico  | 17      |                                                                  | 17   | 4    | 9    | 54.11 ± 29.25 | 3.58 ± 2    |              | 9 ± 12.1      | 13 ± 14.6     |         |        |        |               |
| Goldberg 2021*       | USA         | 59      | ECMO first: 11 African American<br>SE first: 12 African American | 27   | 4    | 10   | 55.7 ± 17.7   |             |              |               | 17 ± 15.1     | 32      | 2      | 20     | 55.4 ± 12.6   |
| Hockstein 2021       | USA         | 17      |                                                                  | 17   | 8    | 8    | 54.67 ± 21.02 | 5.43 ± 3.5  | 10.83 ± 7.21 | 13 ± 9.82     | 18.06 ± 14.93 |         |        |        |               |
| Lin 2021             | Taiwan      | 13      |                                                                  | 13   | 2    | 6    | 64 ± 11.58    | 6.23 ± 4.69 |              |               | 36.31 ± 16.88 |         |        |        |               |
| Martinez-Solano 2021 | Spain       | 14      |                                                                  | 14   | 8    |      |               |             |              |               |               |         |        |        |               |
| Prasad 2021          | USA         | 83      | 27 White<br>37 African American                                  | 83   | 12   | 51   | 53.33 ± 16.64 | 5.6 ± 2.89  | 9.59 ± 15.28 |               | 16.87 ± 10.02 |         |        |        |               |
| Stadlbauer 2021      | Germany     | 119     |                                                                  | 119  | 65   | 69   | 50.9 ± 14.8   | 6.6 ± 8.2   | 12.2         | 16.6 ± 18.4   | 20.2 ± 22.7   |         |        |        |               |
| Dumantepe 2022       | Turkey      | 29      |                                                                  | 29   | 7    | 17   | 55.3 ± 9.2    | 3.5 ± 1.1   |              | 9.9 ± 1.6     | 23.7 ± 8.5    |         |        |        |               |
| Hobohm 2022*         | Germany     | 1172354 |                                                                  | 2197 | 1357 | 1358 | 54.67 ± 15.58 |             |              |               | 22.3 ± 26.7   | 1170157 | 183120 | 544174 | 70.67 ± 14.82 |
| Jang 2022            | South Korea | 9       |                                                                  | 9    | 7    | 6    | 54.5 ± 18.18  | 4.1 ± 4.65  |              |               |               |         |        |        |               |
| Ltaief 2022          | Switzerland | 18      |                                                                  | 18   | 15   | 9    | 56.75 ± 5.22  |             | 1.44         | 3.57 ± 6.03   | 4.6 ± 7.16    |         |        |        |               |
| Mously 2022          | USA         | 9       |                                                                  | 9    | 2    | 2    | 52.5 ± 13.47  | 5.98 ± 3.13 |              | 11.75 ± 8.08  | 16.15 ± 9.9   |         |        |        |               |

|                |             |      |          |      |     |     |               |           |  |               |               |     |     |    |               |
|----------------|-------------|------|----------|------|-----|-----|---------------|-----------|--|---------------|---------------|-----|-----|----|---------------|
| Panholzer 2022 | Germany     | 103  |          | 15   | 6   |     |               |           |  |               |               | 88  | 17  |    |               |
| Tsai 2022      | Taiwan      | 40   |          | 25   | 13  | 17  | 53 ± 18.08    |           |  |               |               | 15  | 9   | 5  | 72.67 ± 13.9  |
| Danial 2023    | France      | 41   |          | 41   | 20  | 21  | 47 ± 12.1     | 4.9 ± 5.5 |  | 31.6 ± 60.1   | 4.9 ± 5.5     |     |     |    |               |
| Kondo 2023     | Japan       | 1318 |          | 1269 | 750 |     |               |           |  |               |               |     |     |    |               |
| Nasser 2023    | USA         | 1560 |          | 780  | 312 |     |               |           |  |               |               | 780 | 260 |    |               |
| Nishimoto 2023 | Japan       | 1220 |          | 1220 | 702 | 490 | 59.29 ± 16.02 | 3 ± 3.67  |  | 24.41 ± 48.96 | 3 ± 3.67      |     |     |    |               |
| George 2023    | USA         | 10   |          | 10   | 4   | 6   | 55 ± 14.5     | 5 ± 4.3   |  |               | 16.33 ± 13.76 |     |     |    |               |
| Kelty 2023     | USA         | 92   | White 19 | 22   | 9   | 9   | 53.45 ± 14.57 |           |  |               | 25.81 ± 19.3  | 70  | 21  | 42 | 58.41 ± 16.85 |
| Kutcher 2023   | Switzerland | 15   |          | 10   | 5   |     |               | 5.4 ± 3.4 |  |               |               |     |     |    |               |
| Sim 2023       | Korea       | 39   |          | 15   | 6   |     |               | 8.4 ± 6.7 |  |               | 61.2 ± 37.31  | 24  | 7   |    |               |

Abbreviations: ECMO: extracorporeal membrane oxygenation, ICU: intensive care unit, MV: mechanical ventilation, SE: surgical embolectomy, USA: United States of America

Data presented as mean ± standard deviation.

\*Values derived from combining subgroup data provided by the studies

**Table S4b.** Risk factors [9,10,26-62]

| Author               | Patients with ECMO | Patients without ECMO | Patients with ECMO |     |     |      |         |                |     |         |            |            |             |                  |       | Patients without ECMO |         |         |      |         |                |         |         |            |            |             |                  |       |
|----------------------|--------------------|-----------------------|--------------------|-----|-----|------|---------|----------------|-----|---------|------------|------------|-------------|------------------|-------|-----------------------|---------|---------|------|---------|----------------|---------|---------|------------|------------|-------------|------------------|-------|
|                      |                    |                       | >60 yo             | HTN | DM  | HL D | Obesity | COP D / Asthma | CAD | Smoking | Thrombosis | Malignancy | Immorbility | Recent operation | Other | >60 yo                | HTN     | DM      | HL D | Obesity | COP D / Asthma | CAD     | Smoking | Thrombosis | Malignancy | Immorbility | Recent operation | Other |
| Schmid 1991          | 27                 |                       |                    |     |     |      |         |                |     |         |            |            | 13          |                  |       |                       |         |         |      |         |                |         |         |            |            |             |                  |       |
| Kawahito 2000        | 7                  |                       |                    |     |     |      |         |                |     | 2       | 1          | 1          | 1           | 1                |       |                       |         |         |      |         |                |         |         |            |            |             |                  |       |
| Maggio 2007          | 21                 |                       | 2                  |     |     |      |         |                |     | 11      |            |            | 13          | 6                | 6     |                       |         |         |      |         |                |         |         |            |            |             |                  |       |
| Hashiba 2012         | 12                 |                       | Not reported       |     |     |      |         |                |     |         |            |            |             |                  |       |                       |         |         |      |         |                |         |         |            |            |             |                  |       |
| Munakata 2012        | 10                 |                       |                    |     |     |      |         |                | 5   |         |            |            |             | 3                |       |                       |         |         |      |         |                |         |         |            |            |             |                  |       |
| George 2018          | 32                 |                       |                    | 14  | 12  |      |         |                | 4   |         | 3          | 4          |             |                  |       |                       |         |         |      |         |                |         |         |            |            |             |                  |       |
| Meneveau 2018        | 52                 | 128                   |                    | 14  |     |      |         | 1              | 3   | 12      | 20         | 4          | 25          | 10               | 11    |                       |         |         |      | 8       |                |         | 7       | 34         |            |             | 12               |       |
| Minakawa 2018        | 94                 | 261                   |                    |     |     |      |         |                |     |         |            |            |             |                  |       |                       |         |         |      |         |                |         |         |            |            |             |                  |       |
| Ius 2019             | 36                 |                       | Not reported       |     |     |      |         |                |     |         |            |            |             |                  |       |                       |         |         |      |         |                |         |         |            |            |             |                  |       |
| Kjaergaard 2019      | 22                 | 14                    | 18                 |     |     |      |         |                |     |         |            | 3          |             | 16               |       |                       |         |         |      |         |                |         |         |            |            |             |                  |       |
| Mandigers 2019       | 19                 | 20                    |                    |     |     |      |         | 1              | 0   |         |            |            |             |                  |       |                       |         |         | 5    | 4       |                |         |         |            |            |             |                  |       |
| Miyazaki 2019        | 9                  |                       | 2                  |     |     |      |         |                |     |         | 1          |            | 3           | 1                |       |                       |         |         |      |         |                |         |         |            |            |             |                  |       |
| Oh 2019              | 16                 |                       |                    | 4   | 4   |      |         |                |     | 2       | 1          | 6          | 3           | 5                | 5     |                       |         |         |      |         |                |         |         |            |            |             |                  |       |
| Kaese 2020           | 12                 |                       |                    |     |     |      |         |                |     |         |            | 1          |             |                  |       |                       |         |         |      |         |                |         |         |            |            |             |                  |       |
| Sertic 2020          | 36                 |                       |                    | 21  | 11  |      |         |                |     |         | 15         | 7          |             | 17               |       |                       |         |         |      |         |                |         |         |            |            |             |                  |       |
| Giraud 2021          | 36                 |                       |                    | 5   |     |      |         |                |     |         |            |            |             | 18               | 3     |                       |         |         |      |         |                |         |         |            |            |             |                  |       |
| Guliani 2021         | 17                 |                       |                    |     |     |      |         |                |     | 2       |            |            | 1           | 5                | 1     |                       |         |         |      |         |                |         |         |            |            |             |                  |       |
| Goldberg 2021        | 27                 | 32                    |                    |     | 6   |      |         | 7              | 2   | 6       | 8          | 4          |             | 9                |       |                       |         | 11      |      | 10      | 2              | 7       | 2       | 7          |            | 10          |                  |       |
| Hockstein 2021       | 17                 |                       |                    | 10  | 4   |      |         |                |     | 3       | 3          | 2          | 4           | 4                | 15    |                       |         |         |      |         |                |         |         |            |            |             |                  |       |
| Lin 2021             | 13                 |                       |                    |     |     |      |         |                |     |         |            | 5          | 6           | 6                | 1     |                       |         |         |      |         |                |         |         |            |            |             |                  |       |
| Martinez-Solano 2021 | 14                 |                       | Not reported       |     |     |      |         |                |     |         |            |            |             |                  |       |                       |         |         |      |         |                |         |         |            |            |             |                  |       |
| Prasad 2021          | 83                 |                       |                    |     |     |      |         |                | 12  | 31      | 13         | 10         | 12          | 16               |       |                       |         |         |      |         |                |         |         |            |            |             |                  |       |
| Stadlbauer 2021      | 119                |                       | Not reported       |     |     |      |         |                |     |         |            |            |             |                  |       |                       |         |         |      |         |                |         |         |            |            |             |                  |       |
| Dumantepe 2022       | 29                 |                       |                    | 14  |     |      |         | 5              |     | 16      | 9          | 5          | 11          | 3                | 11    |                       |         |         |      |         |                |         |         |            |            |             |                  |       |
| Hobohm 2022          | 2197               | 1170 157              |                    | 680 | 429 |      | 319     | 198            | 429 |         |            | 256        |             |                  | 13    |                       | 507 979 | 160 700 |      | 1118 04 | 1202 84        | 160 700 |         |            | 23600 3    |             |                  | 13141 |
| Jang 2022            | 18                 |                       |                    | 2   |     |      |         |                |     | 3       | 1          |            |             | 2                | 1     |                       |         |         |      |         |                |         |         |            |            |             |                  |       |
| Ltaief 2022          | 9                  |                       | 9                  | 7   | 2   |      |         | 1              |     |         | 10         | 3          |             | 8                | 6     |                       |         |         |      |         |                |         |         |            |            |             |                  |       |
| Mously 2022          | 25                 |                       |                    | 4   | 3   | 2    |         |                |     | 3       | 2          | 1          |             | 5                | 1     |                       |         |         |      |         |                |         |         |            |            |             |                  |       |
| Panholzer 2022       | 103                | 88                    | Not reported       |     |     |      |         |                |     |         |            |            |             |                  |       |                       |         |         |      |         |                |         |         |            |            |             |                  |       |
| Tsai 2022            | 27                 | 15                    |                    | 8   | 3   | 3    |         |                | 4   |         | 6          | 7          | 6           | 15               | 2     |                       | 6       | 4       | 2    |         |                | 3       |         | 1          | 3          | 7           | 1                | 2 CHF |

[illegible]

Abbreviations: CAD: Coronary artery disease, COPD: Chronic obstructive pulmonary disease, DM: Diabetes Mellitus, ECMO: Extracorporeal membrane oxygenation, HLD: Hyperlipidaemia, HTN: Hypertension

**Table S4c.** Definitive therapies for haemodynamically unstable pulmonary embolism [9,10,26-62]

| Author          | Patients with ECMO | Patients without ECMO | Patients with ECMO        |        |           |        |           |        |            |        |           |        | Patients without ECMO |        |       |        |       |        |
|-----------------|--------------------|-----------------------|---------------------------|--------|-----------|--------|-----------|--------|------------|--------|-----------|--------|-----------------------|--------|-------|--------|-------|--------|
|                 |                    |                       | With definitive treatment |        | ECMO Only |        | ECMO + SE |        | ECMO + CDT |        | ECMO + ST |        | SE                    |        | CDT   |        | ST    |        |
|                 |                    |                       | Total                     | Deaths | Total     | Deaths | Total     | Deaths | Total      | Deaths | Total     | Deaths | Total                 | Deaths | Total | Deaths | Total | Deaths |
| Schmid 1991     | 27                 |                       | 27                        | 12     |           |        | 27        | 12     |            |        |           |        |                       |        |       |        |       |        |
| Kawahito 2000   | 7                  |                       | 7                         | 3      |           |        | 3         | 1      |            |        | 4         | 2      |                       |        |       |        |       |        |
| Maggio 2007     | 21                 |                       | 13                        | 8      | 8         | 0      | 11        | 1      |            |        |           |        |                       |        |       |        |       |        |
| Munakata 2012   | 10                 |                       | 10                        | 3      |           |        |           |        | 8          | 2      | 2         | 1      |                       |        |       |        |       |        |
| George 2018     | 32                 |                       | 22                        | 11     |           |        | 2         | 2      | 15         | 4      | 5         | 5      |                       |        |       |        |       |        |
| Meneveau 2018   | 52                 | 128                   | 34                        | 18     | 18        | 14     | 17        | 7      |            |        | 17        | 13     | 8                     | 1      |       |        | 68    | 24     |
| Ius 2019        | 36                 |                       | 20                        | 1      | 16        | 11     | 20        | 1      |            |        |           |        |                       |        |       |        |       |        |
| Mandigers 2019  | 19                 | 20                    | 18                        |        | 1         |        |           |        |            |        | 18        |        |                       |        |       |        | 12    |        |
| Miyazaki 2019   | 9                  |                       | 5                         | 0      | 4         | 1      |           |        | 1          | 0      | 4         | 0      |                       |        |       |        |       |        |
| Oh 2019         | 16                 |                       | 13                        | 6      | 3         | 1      | 9         | 4      |            |        | 7         | 3      |                       |        |       |        |       |        |
| Sertic 2020     | 36                 |                       | 16                        | 7      | 20        | 13     | 3         | 2      | 6          | 2      | 7         | 3      |                       |        |       |        |       |        |
| Giraud 2021     | 36                 |                       | 17                        | 11     | 19        | 2      |           |        | 5          | 1      | 16        | 10     |                       |        |       |        |       |        |
| Guliani 2021    | 17                 |                       | 10                        |        | 3         |        |           |        | 10         |        |           |        |                       |        |       |        |       |        |
| Goldberg 2021   | 27                 | 32                    | 10                        | 1      | 21        | 4      | 6         | 1      |            |        | 4         | 0      | 32                    | 2      |       |        |       |        |
| Hockstein 2021  | 17                 |                       |                           |        | 5         | 1      | 1         | 0      | 3          | 2      | 8         | 5      |                       |        |       |        |       |        |
| Lin 2021        | 13                 |                       | 13                        | 2      |           |        |           |        | 4          | 1      | 9         | 1      |                       |        |       |        |       |        |
| Prasad 2021     | 83                 |                       | 42                        |        | 41        |        | 16        |        | 11         |        | 18        | 2      |                       |        |       |        |       |        |
| Stadlbauer 2021 | 119                |                       | 69                        |        | 52        |        | 17        |        |            |        | 50        |        |                       |        |       |        |       |        |
| Dumantepe 2022  | 29                 |                       | 29                        | 7      |           |        |           |        | 29         | 7      |           |        |                       |        |       |        |       |        |
| *Hobohm 2022    | 2197               | 1170157               | 526                       | 365    | 629       | 385    | 304       | 160    |            |        | 222       | 162    | 1478                  |        |       |        | 48759 |        |
| Jang 2022       | 18                 |                       | 3                         | 3      | 6         | 0      | 1         | 1      | 1          | 1      | 2         | 2      |                       |        |       |        |       |        |
| Liu             | 9                  |                       | 5                         | 0      | 4         | 1      |           |        | 5          | 0      |           |        |                       |        |       |        |       |        |
| Ltaief 2022     | 9                  |                       | 10                        | 6      | 8         | 7      | 4         | 3      | 1          | 0      | 9         | 6      |                       |        |       |        |       |        |
| Mously 2022     | 25                 |                       | 9                         | 2      |           |        |           |        | 9          | 2      |           |        |                       |        |       |        |       |        |
| Panholzer 2022  | 15                 | 88                    |                           |        |           |        |           |        |            |        |           |        |                       |        |       |        |       |        |
| Tsai 2022       | 27                 | 15                    | 9                         | 2      | 16        | 11     | 0         | 0      | 6          | 0      | 3         | 2      | 0                     | 0      | 2     | 1      | 1     | 1      |
| Nishimoto 2023  | 1220               |                       | 432                       | 255    | 788       | 477    |           |        |            |        | 432       | 225    |                       |        |       |        |       |        |
| Kutcher 2023    | 10                 |                       | 10                        | 5      |           |        |           |        | 10         | 5      |           |        |                       |        |       |        |       |        |
| Sim 2023        | 15                 | 24                    | 15                        | 6      |           |        |           |        |            |        | 15        | 6      |                       |        |       |        |       |        |

\* Values derived by combining subgroup data provided by studies

Abbreviations: CDT: catheter-directed therapies, ECMO: extracorporeal membrane oxygenation, SE: surgical embolectomy, ST: systemic thrombolysis

Studies not reporting on definitive therapies are excluded from this table

**Table S4d.** Details of pulmonary embolism [9,10,26-62]

| Author         | Patients with ECMO | Patients with out ECMO | Patients with ECMO                                                                                                                           |                                                                                                                                          |                                           |                                                  |                                              |
|----------------|--------------------|------------------------|----------------------------------------------------------------------------------------------------------------------------------------------|------------------------------------------------------------------------------------------------------------------------------------------|-------------------------------------------|--------------------------------------------------|----------------------------------------------|
|                |                    |                        | PE Location                                                                                                                                  | PE Type                                                                                                                                  | Past Hx of PE                             | CTPA Results                                     | TTE Results                                  |
| Schmid 1991    | 27                 |                        |                                                                                                                                              |                                                                                                                                          |                                           | 8 positive                                       | 1 positive                                   |
| Kawahito 2000  | 7                  |                        |                                                                                                                                              | Fulminant / massive                                                                                                                      |                                           | 7 positive                                       |                                              |
| Maggio 2007    | 21                 |                        | nil                                                                                                                                          | Massive: causing sufficient obstruction to pulmonary flow to result in hemodynamic instability, right ventricular failure, and hypoxemia | 2                                         | 14 positive                                      | 15 RV failure<br>2 minimal RV dysfunction    |
| Munakata 2012  | 10                 |                        | 10 proximal lobular arteries<br>- 6 including main pulmonary artery                                                                          |                                                                                                                                          |                                           |                                                  |                                              |
| Menevea 2018   | 52                 | 128                    | 42 proximal                                                                                                                                  |                                                                                                                                          |                                           |                                                  |                                              |
| Ius 2019       | 36                 |                        | central pulmonary vessels 36,<br>Right heart chamber 8                                                                                       | thrombus                                                                                                                                 |                                           |                                                  |                                              |
| Oh 2019        | 16                 |                        |                                                                                                                                              |                                                                                                                                          |                                           | 12 out of 13 who underwent CTPA showed RV strain | Right ventricular dilatation and dysfunction |
| Kaese 2020     | 12                 |                        | 1 right atrium into RV                                                                                                                       |                                                                                                                                          |                                           | 7 patients confirmed diagnosis by CT             |                                              |
| Sertic 2020    | 36                 |                        |                                                                                                                                              |                                                                                                                                          | 10                                        |                                                  |                                              |
| Prasad 2021    | 83                 |                        | Saddle: 37<br>Lobar: 41                                                                                                                      |                                                                                                                                          |                                           | 79 diagnosed by CTPA                             |                                              |
| Dumantepe 2022 | 29                 |                        | 11 saddle PE<br>6 clot-in-transit in right atrium<br>29 proximal lobar or lobular arteries<br>11 massive thrombus in main pulmonary arteries |                                                                                                                                          |                                           |                                                  |                                              |
| Jang 2022      | 18                 |                        | 8 bilateral pulmonary embolism                                                                                                               |                                                                                                                                          |                                           | 8 thrombus visualised<br>7 RV strain on CTPA     |                                              |
| Ltaief 2022    | 9                  |                        |                                                                                                                                              |                                                                                                                                          |                                           | 13 positive                                      |                                              |
| Mously 2022    | 25                 |                        |                                                                                                                                              |                                                                                                                                          |                                           | 8                                                |                                              |
| George 2023    | 10                 |                        | Saddle pulmonary embolus: 7<br>Extensive bilateral pulmonary emboli: 3<br>Clot in transit: 2                                                 |                                                                                                                                          |                                           | Moderate to severe RV strain : 10                |                                              |
| Kelty 2023     | 22                 | 70                     |                                                                                                                                              |                                                                                                                                          |                                           |                                                  |                                              |
| Kutcher 2023   | 10                 |                        |                                                                                                                                              |                                                                                                                                          | Cardiac arrest: 4<br>Obstructive shock: 8 | All confirmed diagnosis by CTPA                  |                                              |

|          |    |    |                                     |  |                                                                                         |  |  |
|----------|----|----|-------------------------------------|--|-----------------------------------------------------------------------------------------|--|--|
|          |    |    |                                     |  | Persistent arterial hypotension: 3<br>At least one contraindication to thrombolysis: 15 |  |  |
| Sim 2023 | 15 | 24 | Large bilateral thromboembolism: 39 |  |                                                                                         |  |  |

Studies not reporting relevant details have been removed from this table. Details are included only for ECMO population.

Abbreviations: CT: computed tomography, CTPA: computed tomography pulmonary angiogram, LVEF: left ventricular ejection fraction, PAP: pulmonary artery pressure, PE: pulmonary embolism, RV: right ventricle, RVSP: right ventricular systolic pressure

**Table S4e.** Patient characteristics at admission for patients with ECMO [9,10,26-62]

| Author          | Number of patients | ECPR | Cardiac arrest | Systolic BP   | MAP        | Heart Rate     | Troponin I  | RV Abnormality | Inotropic or vasopressor Use | pH          | Lactate       | SAPS II | SAPS III | APACHE |
|-----------------|--------------------|------|----------------|---------------|------------|----------------|-------------|----------------|------------------------------|-------------|---------------|---------|----------|--------|
| Schmid 1991     | 27                 |      | 16             |               |            |                |             |                | 11                           |             |               |         |          |        |
| Kawahito 2000   | 7                  |      | 3              |               |            |                |             | 7              |                              |             |               |         |          |        |
| Maggio 2007     | 21                 | 10   | 8              |               |            |                |             | 17             | 12                           | 7.13 ± 0.18 |               |         |          |        |
| Hashiba 2012    | 12                 |      | 5              | 66.33 ± 21.13 |            | 121 ± 22       |             |                |                              | 7.01 ± 0.25 |               |         |          |        |
| Munakata 2012   | 10                 |      | 9              |               |            |                |             | 10             | 10                           |             |               |         |          |        |
| George 2018     | 32                 | 15   | 15             |               |            |                |             |                | 32                           |             | 7.51 ± 6.48   |         |          |        |
| Meneveau 2018   | 52                 |      | 39             | 91.9 ± 47.6   |            | 94 ± 51        | 2.58 ± 3.16 | 53             | 49                           | 7.18 ± 0.24 | 7.36 ± 6.8    |         |          |        |
| Ius 2019        | 36                 |      | 15             |               |            |                |             |                | 36                           |             |               |         |          |        |
| Kjaergaard 2019 | 22                 |      | 17             |               |            |                |             |                |                              |             |               |         |          |        |
| Mandigers 2019  | 19                 |      | 19             |               |            |                |             |                |                              | 6.78 ± 0.15 | 14 ± 4.25     |         |          |        |
| Miyazaki 2019   | 9                  | 19   | 9              |               |            |                |             | 9              |                              | 6.98 ± 0.51 | 14.67 ± 12.25 |         |          |        |
| Oh 2019         | 16                 | 12   | 12             |               |            |                |             | 15             |                              |             |               |         |          |        |
| Kaese 2020      | 12                 | 3    | 11             |               |            |                |             | 5              |                              |             |               |         |          |        |
| Sertic 2020     | 36                 | 12   | 22             |               |            |                |             | 36             | 36                           |             |               |         |          |        |
| Giraud 2021     | 36                 | 13   | 22             | 76 ± 41.69    | 59 ± 27.02 | 108 ± 36.29    |             | 36             |                              | 7.08 ± 0.29 | 8.3 ± 8.57    |         |          |        |
| Guliani 2021    | 17                 | 10   | 10             | 88.47 ± 41.83 |            | 111.91 ± 57.21 |             |                |                              | 7.1 ± 0.38  | 10.97 ± 13.48 |         |          |        |
| Goldberg 2021   | 27                 |      | 10             | 81 ± 19       |            | 112 ± 25       |             |                |                              |             |               |         |          |        |

|                 |      |    |     |                |               |                |             |                                                                         |  |             |              |             |  |  |
|-----------------|------|----|-----|----------------|---------------|----------------|-------------|-------------------------------------------------------------------------|--|-------------|--------------|-------------|--|--|
| Hockstein 2021  | 17   |    |     |                |               | 117.84 ± 29.85 | 1.57 ± 3.2  |                                                                         |  | 7.07 ± 0.29 | 9.64 ± 7.19  |             |  |  |
| Lin 2021        | 13   |    | 13  |                |               |                |             |                                                                         |  |             |              |             |  |  |
| Prasad 2021     | 83   | 15 | 23  |                |               |                | 1.85 ± 5.64 | 52                                                                      |  |             | 4.74 ± 3.55  |             |  |  |
| Stadlbauer 2021 | 119  |    |     |                | 55 ± 17       |                |             |                                                                         |  | 7.2 ± 0.17  | 9.6 ± 6.9    |             |  |  |
| Dumantepe 2022  | 29   |    |     | 76.4 ± 8.9     | 55.6 ± 7.7    |                | 2.12 ± 0.37 |                                                                         |  | 7.11 ± 0.13 | 12.5 ± 2.6   |             |  |  |
| Hobohm 2022     | 2197 |    | 992 |                |               |                |             | 1209                                                                    |  |             |              |             |  |  |
| Jang 2022       | 9    |    | 9   |                | 56.75 ± 40.07 | 80.75 ± 41.41  |             |                                                                         |  |             |              |             |  |  |
| Ltaief 2022     | 18   |    | 16  |                | 76.67 ± 17.7  | 95 ± 32.98     |             |                                                                         |  | 7.08 ± 0.34 | 13.73 ± 8.93 |             |  |  |
| Mously 2022     | 9    |    | 6   |                |               |                | 1.22 ± 0.53 |                                                                         |  |             | 8.33 ± 4.55  |             |  |  |
| Panholzer 2022  | 15   |    | 9   |                |               |                |             |                                                                         |  |             |              |             |  |  |
| Tsai 2022       | 25   |    | 15  |                |               |                | 0.15 ± 0.24 |                                                                         |  | 7.13 ± 0.24 |              |             |  |  |
| Danial 2023     | 41   |    |     |                |               |                |             |                                                                         |  | 7.1 ± 0.23  | 10.5 ± 7.8   | 70.1 ± 19.4 |  |  |
| Nishimoto 2023  | 1220 |    | 736 |                |               |                |             |                                                                         |  |             |              |             |  |  |
| George 2023     | 10   | 6  |     |                |               |                |             |                                                                         |  |             |              |             |  |  |
| Kelty 2023      | 22   |    |     | 101.32 ± 31.73 | 77.23 ± 19.56 |                |             | RV dilated: 9<br>RV function reduced: 14<br>Septal flattening: 7        |  | 7.2 ± 0.2   | 4.54 ± 3.7   |             |  |  |
| Kucher 2023     | 10   |    |     |                |               |                |             |                                                                         |  | 7.22 ± 0.19 |              |             |  |  |
| Sim 2023        | 15   |    |     |                |               |                |             | RV ventricular dilatation and flattening of interventricular septum: 15 |  |             |              |             |  |  |

Studies not reporting relevant details have been removed from this table.

Abbreviations: APACHE: Acute Physiology and Chronic Health Evaluation, BP: blood pressure, ECPR: extracorporeal cardiopulmonary resuscitation, MAP: mean arterial pressure, RV: right ventricle, SAPS: Simplified Acute Physiology Score

**Table S4f.** Patient characteristics at admission for patients without ECMO [9,10,26-62]

| Author         | Number of patients | Patients with cardiac arrest | Systolic BP    | MAP           | Heart Rate | Troponin I   | RV Abnormality | Inotropic or vasopressor Use | pH          | Lactate     | SOFA Score  | SAPS II | SAPS III | APACHE |
|----------------|--------------------|------------------------------|----------------|---------------|------------|--------------|----------------|------------------------------|-------------|-------------|-------------|---------|----------|--------|
| Meneveau 2018  | 128                | 45                           | 98.6 ± 29.7    |               | 102 ± 22   | 8.95 ± 19.34 |                | 111                          |             |             |             |         |          |        |
| Moon 2018      | 9                  | 8                            |                |               |            |              | 7              |                              | 7.2 ± 0.3   |             |             |         |          |        |
| Mandiger 2019  | 20                 |                              |                |               |            |              |                |                              | 6.51 ± 0.97 | 14.5 ± 6.86 |             |         |          |        |
| Goldberg 2021  | 32                 | 12                           | 90 ± 24        |               | 113 ± 14   |              |                |                              |             |             |             |         |          |        |
| Hobohm 2022    | 1170157            | 76204                        |                |               |            |              | 332292         |                              |             |             |             |         |          |        |
| Panholzer 2022 | 99                 | 9                            |                |               |            |              |                |                              |             |             |             |         |          |        |
| Tsai 2022      | 15                 | 3                            |                |               |            | 0.43 ± 0.7   |                |                              | 7.26 ± 0.13 |             |             |         |          |        |
| Nasser 2023    | 780                |                              |                |               |            |              |                |                              |             |             |             |         |          |        |
| Kelty 2023     | 70                 |                              | 101.32 ± 31.73 | 77.23 ± 19.56 |            |              |                |                              | 7.22 ± 0.19 | 4.54 ± 3.7  | 9.55 ± 3.14 |         |          |        |

Studies not reporting relevant details have been removed from this table.

Abbreviations: APACHE: Acute Physiology and Chronic Health Evaluation, BP: blood pressure, MAP: mean arterial pressure, RV: right ventricle, SAPS: Simplified Acute Physiology Score

**Table S4g.** ECMO Characteristics [9,10,26-62]

| Author               | Number of patients | ECMO Cannula Site                                                                                | VA-ECMO | VA-ECMO Mortality | VV-ECMO | VV-ECMO Mortality | ECMO Flow Rate  |
|----------------------|--------------------|--------------------------------------------------------------------------------------------------|---------|-------------------|---------|-------------------|-----------------|
| Schmid 1991          | 27                 | Aortic and right atrial cannulas                                                                 | 27      |                   |         |                   |                 |
| Kawahito 2000        | 7                  | Fem-fem (15Fr art, 21Fr vein)                                                                    | 7       |                   |         |                   | 3.375 ± 0.92    |
| Maggio 2007          | 21                 | VA: femoral vessel<br>VV: R int jug + R common fem veins                                         | 19      | 8                 | 2       | 0                 |                 |
| Hashiba 2012         | 12                 | Femoral a/v using Seldinger technique                                                            | 12      |                   |         |                   | 2.0-5.0L/min/m2 |
| Munakata 2012        | 10                 | Fem-fem                                                                                          | 10      |                   |         |                   |                 |
| Meneveau 2018        | 52                 |                                                                                                  | 52      |                   |         |                   |                 |
| Minakawa 2018        | 94                 |                                                                                                  | 94      |                   |         |                   |                 |
| Ius 2019             | 36                 | Femoro femoral, Femorofemoral and IJV                                                            | 36      |                   |         |                   | 2-3 litres      |
| Kjaergaard 2019      | 22                 | 17Fr art<br>21Fr ven<br>femfem VA-ECMO                                                           | 22      |                   |         |                   |                 |
| Mandigers 2019       | 19                 |                                                                                                  | 19      |                   |         |                   |                 |
| Miyazaki 2019        | 9                  | fem-fem; (art: 16F, vein: 22F, superficial fem artery: 4F)                                       | 9       |                   |         |                   |                 |
| Oh 2019              | 16                 | Femoro femoral                                                                                   | 16      |                   |         |                   |                 |
| Kaese 2020           | 12                 | femorofemoral 10 patients and femoral subclavian in 2 patients                                   | 12      |                   |         |                   |                 |
| Sertic 2020          | 36                 | VA- FF VV- FIJV                                                                                  | 32      | 18                | 4       | 2                 | 4-6 litres      |
| Giraud 2021          | 36                 | Femoral-femoral VA-ECMO: 36<br>Percutaneous VA-ECMO: 25                                          | 36      |                   |         |                   |                 |
| Guliani 2021         | 17                 |                                                                                                  | 17      |                   |         |                   |                 |
| Goldberg 2021        | 27                 |                                                                                                  | 27      |                   |         |                   |                 |
| Hockstein 2021       | 17                 |                                                                                                  | 17      |                   |         |                   |                 |
| Lin 2021             | 13                 | FF                                                                                               | 13      |                   |         |                   |                 |
| Martinez-Solano 2021 | 14                 |                                                                                                  | 14      |                   |         |                   |                 |
| Prasad 2021          | 83                 | Arterial access site (RFA): 28<br>Arterial access site (LFA): 37<br>Venous access site (LFV): 26 | 83      |                   |         |                   |                 |

|                 |      |                                                                                                          |      |     |      |     |          |
|-----------------|------|----------------------------------------------------------------------------------------------------------|------|-----|------|-----|----------|
|                 |      | Venous access site (RFV): 37<br>Venous access site (RIJ): 2                                              |      |     |      |     |          |
| Stadlbauer 2021 | 119  |                                                                                                          | 87   |     | 32   |     |          |
| Dumantepe 2022  | 29   | fem-fem + distal perfusion cannula in superficial femoral artery                                         | 29   | 7   |      |     | 2-4L/min |
| Hobohm 2022     | 2197 |                                                                                                          | 1155 | 751 | 1042 | 436 |          |
| Jang 2022       | 9    | 16-18F arterial<br>20-22FR venous                                                                        | 9    |     |      |     |          |
| Mously 2022     | 9    |                                                                                                          | 9    | 2   |      |     |          |
| Danial 2023     | 41   | Axillary: 2, Femoral: 38                                                                                 | 41   | 20  | 0    | 0   |          |
| George 2023     | 10   | Femoral: 9<br>right atrial to pulmonary artery cannula (Protek Duo) and connect to an<br>ECMO Circuit: 1 | 9    | 4   |      |     |          |
| Kelty 2023      | 22   |                                                                                                          | 22   | 9   |      |     |          |
| Kucher 2023     | 10   |                                                                                                          | 10   | 5   |      |     |          |
| Sim 2023        | 15   | Femoral: 15                                                                                              | 15   | 6   |      |     |          |

Studies not reporting relevant details have been removed from this table.

Abbreviations: ECMO: extracorporeal membrane oxygenation, VA: venoarterial, VV: venovenous

**Table S4h.** Subgroup demographics by region [9,10,26-62]

| Subgroup                  |               | Studies | Mean   | 95% Confidence Interval |
|---------------------------|---------------|---------|--------|-------------------------|
| Age (years)               | Europe        | 11      | 51.41  | 48.83 to 53.39          |
|                           | Asia          | 11      | 57.59  | 54.90 to 60.29          |
|                           | North America | 10      | 50.19  | 50.19 to 55.63          |
| Proportion of males (%)   | Europe        | 14      | 59.73% | 55.40% to 63.99%        |
|                           | Asia          | 14      | 47.50% | 37.79% to 57.29%        |
|                           | North America | 11      | 48.98% | 41.62% to 56.37%        |
| Pre-ECMO pH               | Europe        | 6       | 7.07   | 6.94 to 7.20            |
|                           | Asia          | 5       | 7.08   | 7.08 to 7.16            |
|                           | North America | 5       | 7.16   | 7.10 to 7.21            |
| Pre-ECMO Lactate (mmol/L) | Europe        | 6       | 10.43  | 8.26 to 12.60           |
|                           | Asia          | 2       | 12.53  | 11.59 to 13.47          |
|                           | North America | 6       | 6.87   | 4.94 to 8.81            |

Abbreviations: ECMO: extracorporeal membrane oxygenation

**Table S5.** Joanna Briggs Institute Checklist  
**Case series**

| Author               | Domain |   |   |   |   |   |   |   |    |    | Total Score |
|----------------------|--------|---|---|---|---|---|---|---|----|----|-------------|
|                      | 1      | 2 | 3 | 4 | 5 | 6 | 7 | 8 | 9  | 10 |             |
| Schmid 1991          | ?      | ✓ | ✓ | ✓ | ✓ | ✓ | ✓ | ✓ | ✓  | ✓  | 9           |
| Kawahito 2000        | ?      | ✓ | ✓ | ? | ? | ✓ | ✓ | ✓ | ✓  | ✓  | 7           |
| Maggio 2007          | ✓      | ✓ | ✓ | ? | ✓ | ✓ | ✓ | ✓ | ✓  | ✓  | 9           |
| Hashiba 2012         | ✓      | ✓ | ✓ | ✓ | ✓ | ✓ | ✓ | ✓ | ✓  | ✓  | 10          |
| Munakata 2012        | ✓      | ✓ | ✓ | ✓ | ✓ | ✓ | ✓ | ✓ | ✓  | ✓  | 10          |
| George 2018          | ✓      | ✓ | ✓ | ✓ | ✓ | ✓ | ✓ | ✓ | ✓  | ✓  | 10          |
| Ius 2019             | ✓      | ✓ | ✓ | ✓ | ✓ | ? | ✓ | ✓ | ?  | NA | 7           |
| Kjaergaard 2019      | ✓      | ✓ | ✓ | ✓ | X | ✓ | ✓ | ✓ | ✓  | ✓  | 9           |
| Mandigers 2019       | ✓      | ✓ | ✓ | ✓ | ✓ | ✓ | ✓ | ✓ | ✓  | NA | 9           |
| Oh 2019              | ✓      | ✓ | ✓ | ✓ | ✓ | ✓ | ✓ | ✓ | ✓  | ✓  | 10          |
| Kaese 2020           | ✓      | ✓ | ✓ | ✓ | ? | ? | X | ✓ | ✓  | ✓  | 7           |
| Sertic 2020          | ✓      | ✓ | ✓ | ? | ? | ✓ | ✓ | ✓ | ✓  | ✓  | 8           |
| Giraud 2021          | ✓      | ✓ | ✓ | ? | ? | ✓ | ✓ | ✓ | ✓  | ✓  | 8           |
| Guliani 2021         | ✓      | ✓ | ✓ | ✓ | ? | ✓ | ✓ | ✓ | ✓  | ✓  | 9           |
| Hockstein 2021       | ✓      | ✓ | ✓ | ? | ? | ✓ | ✓ | ✓ | ✓  | ✓  | 8           |
| Lin 2021             | ✓      | ✓ | ✓ | ? | ? | ✓ | ✓ | ✓ | ✓  | ✓  | 8           |
| Martinez-Solano 2021 | ✓      | ✓ | ? | ✓ | ✓ | ✓ | ✓ | ✓ | ✓  | ✓  | 9           |
| Prasad 2021          | ✓      | ✓ | ✓ | ✓ | ✓ | ✓ | ✓ | ✓ | ✓  | ✓  | 10          |
| Stadlbauer 2021      | ✓      | ✓ | ✓ | ✓ | ✓ | ✓ | ✓ | ✓ | ✓  | ✓  | 10          |
| Dumantepe 2022       | ✓      | ✓ | ✓ | ✓ | ✓ | ✓ | ✓ | ✓ | ✓  | ✓  | 10          |
| Jang 2022            | ✓      | ✓ | ✓ | ✓ | ✓ | ✓ | ✓ | ✓ | ✓  | ✓  | 10          |
| Liu 2022             | ✓      | ✓ | ✓ | ✓ | ✓ | ? | X | ✓ | X  | ✓  | 7           |
| Ltaief 2022          | ✓      | ✓ | ✓ | ✓ | ✓ | ✓ | ✓ | ✓ | ✓  | ✓  | 10          |
| Mously 2022          | ✓      | ✓ | ✓ | ✓ | ✓ | ✓ | ✓ | ✓ | ✓  | ✓  | 10          |
| Danial 2023          | ✓      | ✓ | ✓ | ✓ | ✓ | ✓ | X | ✓ | X  | ✓  | 8           |
| Kondo 2023           | ✓      | ✓ | ✓ | ✓ | ✓ | ? | ? | ✓ | NA | ✓  | 7           |

**Legend:**

✓: Yes (1 point)

X: No (0 points)

?: Unsure (0 points)

NA: Not applicable (0 points)

**Domains:**

1: Were there clear criteria for inclusion in the case series?

2: Was the condition measured in a standard, reliable way for all participants included in the case series?

3: Were valid methods used for identification of the condition for all participants included in the case series?

4: Did the case series have consecutive inclusion of participants?

5: Did the case series have complete inclusion of participants?

6: Was there clear reporting of the demographics of the participants in the study?

7: Was there clear reporting of clinical information of the participants?

8: Were the outcomes or follow up results of cases clearly reported?

9: Was there clear reporting of the presenting site(s)/clinic(s) demographic information?

10: Was statistical analysis appropriate?

### Cohort studies

| Author         | Domain |   |   |   |   |   |   |   |   |    |    | Total Score |
|----------------|--------|---|---|---|---|---|---|---|---|----|----|-------------|
|                | 1      | 2 | 3 | 4 | 5 | 6 | 7 | 8 | 9 | 10 | 11 |             |
| Meneveau 2018  | ✓      | ✓ | ✓ | X | X | ✓ | ✓ | ✓ | ✓ | NA | ✓  | 8           |
| Minakawa 2018  | ✓      | ✓ | ✓ | ✓ | X | ✓ | ✓ | ✓ | ✓ | NA | ✓  | 9           |
| Miyazaki 2019  | ✓      | ✓ | ✓ | ✓ | X | ✓ | ✓ | ✓ | ✓ | NA | ✓  | 9           |
| Goldberg 2021  | ✓      | ✓ | ✓ | X | X | ✓ | ✓ | ✓ | ✓ | NA | ✓  | 8           |
| Hobohm 2022    | ✓      | ✓ | ✓ | ✓ | ✓ | ✓ | ✓ | ✓ | ✓ | NA | ✓  | 10          |
| Panholzer 2022 | ✓      | ✓ | ✓ | X | X | ✓ | ✓ | ✓ | ✓ | NA | ?  | 7           |
| Tsai 2022      | ✓      | ✓ | ✓ | ✓ | ? | ✓ | ✓ | ✓ | ✓ | NA | ✓  | 9           |
| Nasser 2023    | ?      | ✓ | ✓ | ? | ✓ | ✓ | ✓ | ✓ | ✓ | NA | ?  | 7           |
| Nishimoto 2023 | ✓      | ✓ | ✓ | ✓ | ✓ | ✓ | ✓ | ? | ? | ?  | ?  | 7           |
| George 2023    | ✓      | ? | ✓ | X | X | ✓ | ✓ | ✓ | ✓ | NA | ✓  | 7           |
| Kelty 2023     | ✓      | ✓ | ✓ | X | X | ✓ | ✓ | ✓ | ✓ | NA | ✓  | 7           |
| Kutcher 2023   | ✓      | ✓ | ✓ | X | X | ✓ | ✓ | ✓ | ? | ?  | ✓  | 6           |
| Sim 2023       | ✓      | ✓ | ✓ | X | X | ✓ | ✓ | ✓ | ✓ | NA | ✓  | 8           |

#### Legend:

✓: Yes (1 point)

X: No (0 points)

?: Unsure (0 points)

NA: Not applicable (0 points)

#### Domains:

- 1: Were the two groups similar and recruited from the same population?
- 2: Were the exposures measured similarly to assign people to both exposed and unexposed groups?
- 3: Was the exposure measured in a valid and reliable way?
- 4: Were confounding factors identified?
- 5: Were strategies to deal with confounding factors stated?
- 6: Were the groups/participants free of the outcome at the start of the study (or at the moment of exposure)?
- 7: Were the outcomes measured in a valid and reliable way?
- 8: Was the follow up time reported and sufficient to be long enough for outcomes to occur?
- 9: Was follow up complete, and if not, were the reasons to loss to follow up described and explored?
- 10: Were strategies to address incomplete follow up utilized?
- 11: Was appropriate statistical analysis used?

**Table S6.** Grading of Recommendations, Assessment, Development, and Evaluations

| № of studies                                               | Certainty assessment  |              |                          |              |             |                                                  | Effect      |                  |                               | Certainty        | Importance |
|------------------------------------------------------------|-----------------------|--------------|--------------------------|--------------|-------------|--------------------------------------------------|-------------|------------------|-------------------------------|------------------|------------|
|                                                            | Study design          | Risk of bias | Inconsistency            | Indirectness | Imprecision | Other considerations                             | № of events | № of individuals | Rate (95% CI)                 |                  |            |
| Mortality at closest time of follow up (assessed with: %)  |                       |              |                          |              |             |                                                  |             |                  |                               |                  |            |
| 39                                                         | observational studies | not serious  | not serious <sup>a</sup> | not serious  | not serious | publication bias strongly suspected <sup>b</sup> | -           | 6409             | mean 42.8% (37.2 to 48.7)     | ⊕⊕⊕○<br>Moderate | CRITICAL   |
| Duration of ECMO support (assessed with: days)             |                       |              |                          |              |             |                                                  |             |                  |                               |                  |            |
| 26                                                         | observational studies | not serious  | not serious <sup>c</sup> | not serious  | not serious | none                                             | -           | 1866             | mean 4.3 days (3.6 to 5.1)    | ⊕⊕⊕○<br>Moderate | IMPORTANT  |
| Duration of intensive care unit stay (assessed with: days) |                       |              |                          |              |             |                                                  |             |                  |                               |                  |            |
| 17                                                         | observational studies | not serious  | not serious <sup>c</sup> | not serious  | not serious | none                                             | -           | 1708             | mean 12.6 days (9.7 to 15.4)  | ⊕⊕⊕○<br>Moderate | IMPORTANT  |
| Duration of hospital stay (assessed with: days)            |                       |              |                          |              |             |                                                  |             |                  |                               |                  |            |
| 20                                                         | observational studies | not serious  | not serious <sup>a</sup> | not serious  | not serious | none                                             | -           | 2753             | mean 21.4 days (18.1 to 26.9) | ⊕⊕⊕○<br>Moderate | IMPORTANT  |
| Duration of mechanical ventilation (assessed with: days)   |                       |              |                          |              |             |                                                  |             |                  |                               |                  |            |
| 5                                                          | observational studies | not serious  | Serious <sup>d</sup>     | not serious  | not serious | none                                             | -           | 273              | mean 7.2 days (2.7 to 11.6)   | ⊕⊕⊕○<br>Moderate | IMPORTANT  |

Legend:

⊕○○○: very low certainty level

⊕⊕○○: low certainty level

⊕⊕⊕○: moderate certainty level

⊕⊕⊕⊕: high certainty level

#### Explanations

- a. There is significant heterogeneity quantitatively and qualitatively. However, subgroup and regression analysis were able to elucidate covariates responsible for the heterogeneity
- b.  $P_{\text{egger}} < 0.0001$ . In view of the significant test from Egger's test, we downgraded the certainty for potential publication bias
- c. There is significant quantitative heterogeneity. However, visual inspection of the forest plots shows that the point estimates are not sparsely distributed, and the confidence intervals overlap.
- d. There is significant quantitative and qualitative heterogeneity.

**Table S7.** Summary of subgroup and meta-regression analysis*Subgroup analysis*

| Subgroup                                              |                        | Studies | Mortality | 95% Confidence Interval |
|-------------------------------------------------------|------------------------|---------|-----------|-------------------------|
| Region<br>$P_{\text{interaction}} = 0.0071$           | Europe; n=2618         | 14      | 53.1%     | 46.3% to 59.8%          |
|                                                       | Asia; n=2737           | 14      | 37.8%     | 27.6% to 49.1%          |
|                                                       | North America; n =1054 | 11      | 34.5%     | 25.6% to 44.6%          |
| Study Type<br>$P_{\text{interaction}} = 0.8828$       | Case Series            | 26      | 42.7%     | 35.4% to 50.3%          |
|                                                       | Cohort Studies         | 13      | 43.1%     | 34.0% to 52.7.%         |
| VA vs VV<br>$P_{\text{interaction}} = 0.88$           | VA = 1963              | 34      | 42.37%    | 35.84% to 49.17%        |
|                                                       | VV = 1048              | 3       | 41.82%    | 38.87% to 44.84%        |
| Publication Year<br>$P_{\text{interaction}} = 0.3247$ | Before 2018            | 5       | 37.3%     | 27.1% to 48.9%          |
|                                                       | 2018 and after         | 34      | 43.6%     | 37.4% to 50.1%          |

Abbreviations: VA = venoarterial, VV = venovenous,

*Meta-regression analysis*

| Covariate                                                                                 | Studies   | B             | LCI           | UCI           | P             |
|-------------------------------------------------------------------------------------------|-----------|---------------|---------------|---------------|---------------|
| Age (years)                                                                               | 32        | -0.0426       | -0.0984       | 0.0133        | 0.1353        |
| <b>Prop. of patients with cardiac arrest</b>                                              | <b>27</b> | <b>1.7719</b> | <b>0.2945</b> | <b>3.2493</b> | <b>0.0187</b> |
| Duration of ECMO (days)                                                                   | 26        | 0.0271        | -0.1209       | 0.1751        | 0.7196        |
| Prop. of males on ECMO                                                                    | 32        | 0.5457        | -1.6262       | 2.7176        | 0.6224        |
| Prop. of patients with a history of thrombosis                                            | 16        | 2.3110        | -0.7934       | 5.4153        | 0.1446        |
| Prop. of patients with prolonged immobilisation                                           | 14        | 0.2348        | -2.2263       | 2.6960        | 0.8517        |
| Prop. of patients having undergone recent operation                                       | 19        | 1.2519        | -1.1778       | 3.6815        | 0.3126        |
| Time to ECMO (hours)                                                                      | 7         | 0.0104        | -0.1490       | 0.1697        | 0.8985        |
| Prop. of patients with haemorrhagic complications while on systemic thrombolysis and ECMO | 8         | -0.0119       | -6.9506       | 6.9267        | 0.9973        |
| Prop. of patients with haemorrhagic complications while on ECMO                           | 26        | 0.7697        | -0.4702       | 2.0096        | 0.2237        |

Abbreviations: B: regression coefficient, ECMO: extracorporeal membrane oxygenation, LCI: lower confidence interval, P: P-value, UCI: upper confidence interval

Values in bold indicate p-value &lt; 0.05.

*Test for differences between definitive therapies with concomitant ECMO*

| Group             | Group               | P-val             |
|-------------------|---------------------|-------------------|
| <b>ECMO Alone</b> | <b>CDT</b>          | 0.0663            |
| ECMO Alone        | SE                  | 0.7631            |
| ECMO Alone        | Thrombolysis        | 0.2545            |
| <b>CDT</b>        | <b>SE</b>           | 0.0872            |
| <b>CDT</b>        | <b>Thrombolysis</b> | <b>&lt;0.0001</b> |

|          |              |        |
|----------|--------------|--------|
| SE       | Thrombolysis | 0.0621 |
| SE + CDT | ECMO Alone   | 0.3153 |

Abbreviations: CDT: catheter-directed therapies, ECMO: extracorporeal membrane oxygenation, SE: surgical embolectomy. Values in bold indicate p-value < 0.05.

*Further breakdown of catheter-directed therapy*

| Study          | Patients receiving catheter-directed thrombolysis | Mortality of patients receiving catheter-directed thrombolysis | Patients receiving catheter-directed embolectomy | Mortality of patients receiving catheter-directed embolectomy |
|----------------|---------------------------------------------------|----------------------------------------------------------------|--------------------------------------------------|---------------------------------------------------------------|
| Sertic 2020    | 6                                                 | 2                                                              | 2                                                | 1                                                             |
| Giraud 2021    | -                                                 | -                                                              | 5                                                | 1                                                             |
| Jang 2022      | -                                                 | -                                                              | 1                                                | 1                                                             |
| George 2018    | 15                                                | 4                                                              | -                                                | -                                                             |
| Lin 2021       | 4                                                 | 1                                                              | -                                                | -                                                             |
| Dumantepe 2022 | 29                                                | 7                                                              | -                                                | -                                                             |
| Mously 2022    | 9                                                 | 2                                                              | -                                                | -                                                             |

Studies not reporting specifically which catheter-directed therapy (embolectomy or thrombolysis) were excluded

**Table S8:** Summary of secondary outcomes

| <b>Outcome</b>          | <b>Studies</b> | <b>Mean</b> | <b>95% CI</b> | <b>N</b> |
|-------------------------|----------------|-------------|---------------|----------|
| Duration of ECMO        | 26             | 4.4 days    | 3.6 to 5.1    | 1866     |
| Length of ICU stay      | 17             | 12.6 days   | 9.7 to 15.4   | 1708     |
| Length of hospital stay | 20             | 22.5 days   | 18.1 to 26.9  | 2753     |
| Duration of MV          | 5              | 7.2 days    | 2.7 to 11.6   | 273      |

Abbreviations: CI: confidence interval, ECMO: extracorporeal membrane oxygenation, MV: mechanical ventilation, ICU: intensive care unit

**Table S9:** Complications reported by included studies [9,10,26-62]

| Author<br>Year     | Complications              |                                                                                            |                                        |                           |                                                                                   |                                                   |                                                                                                            |                              |                                                     |       |
|--------------------|----------------------------|--------------------------------------------------------------------------------------------|----------------------------------------|---------------------------|-----------------------------------------------------------------------------------|---------------------------------------------------|------------------------------------------------------------------------------------------------------------|------------------------------|-----------------------------------------------------|-------|
|                    | Mechanical                 | Haemorrhagic                                                                               | Neurological                           | Renal                     | Cardiovascular                                                                    | Pulmonary                                         | Infectious                                                                                                 | Metabolic                    | Limb                                                | Other |
| Schmid<br>1991     |                            |                                                                                            | 1 ischaemic brain damage               |                           | 4 cardiac failure                                                                 |                                                   |                                                                                                            |                              |                                                     |       |
| Kawahito<br>2000   | Complications not reported |                                                                                            |                                        |                           |                                                                                   |                                                   |                                                                                                            |                              |                                                     |       |
| Maggio<br>2007     | 3 Oxygenator<br>Failure    | 8 Cannula Bleed<br>5 surgical site bleeding<br>1 Femoral Artery<br>Pseudoaneurysm<br>1 HIT | 5 stroke                               | 5 creatinine<br>>3.0mg/dL | 12 haemodynamic<br>instability requiring<br>vasopressors<br>8 cardiac arrhythmias | 3<br>pneumothora<br>x                             | 5 culture proven new infection<br>1 femoral cannula site soft<br>tissue infection requiring<br>debridement | 4<br>hyperbilirubi<br>naemia |                                                     |       |
| Hashiba<br>2012    | Complications not reported |                                                                                            |                                        |                           |                                                                                   |                                                   |                                                                                                            |                              |                                                     |       |
| Munakata<br>2012   |                            | 10 cannula site bleed                                                                      |                                        |                           |                                                                                   | 1 alveolar<br>haemorrhag<br>e<br>1<br>haemothorax |                                                                                                            |                              |                                                     |       |
| Aso 2016           | Complications not reported |                                                                                            |                                        |                           |                                                                                   |                                                   |                                                                                                            |                              |                                                     |       |
| Corsi 2017         |                            | 15 Hemorrhage                                                                              | 4 stroke                               | 13 RRT                    |                                                                                   |                                                   | 2 Surgical Site Infection                                                                                  |                              | 1 Limb<br>Ischaemia                                 |       |
| George<br>2018     |                            | 4 BGIT<br>5 Cannula bleed                                                                  |                                        |                           |                                                                                   |                                                   |                                                                                                            |                              |                                                     |       |
| Meneveau<br>2018   |                            | 90-day major bleeding:<br>20 ECMO vs 8 non-<br>ECMO                                        |                                        |                           |                                                                                   |                                                   |                                                                                                            |                              |                                                     |       |
| Minakawa<br>2018   | Complications not reported |                                                                                            |                                        |                           |                                                                                   |                                                   |                                                                                                            |                              |                                                     |       |
| Moon 2018          |                            | 1 Pseudoaneurysm<br>4 Cannula bleed<br>1 Ulcer bleed                                       | 5 Hypoxic brain injury<br>2 neuropathy | 7 AKI                     |                                                                                   | 2 Pulm<br>haemorrhag<br>e<br>3 pneumonia          | 1 cannula site infection                                                                                   |                              | 1 compartme<br>nt<br>syndrome<br>2 limb<br>ischemia | 4 MOF |
| Elbadawi<br>2019   | Complications not reported |                                                                                            |                                        |                           |                                                                                   |                                                   |                                                                                                            |                              |                                                     |       |
| Ius 2019           |                            | 2 Femoral Bleed                                                                            |                                        | 5 Renal                   |                                                                                   | 1 lung<br>reperfusion<br>edema                    | 3 Infectious                                                                                               |                              | 1 Infectious                                        |       |
| Kjaergaard<br>2019 | Complications not reported |                                                                                            |                                        |                           |                                                                                   |                                                   |                                                                                                            |                              |                                                     |       |

|                      |                                         |                                                                                                                              |                                                                                                              |                                |  |  |                                       |  |                        |                   |
|----------------------|-----------------------------------------|------------------------------------------------------------------------------------------------------------------------------|--------------------------------------------------------------------------------------------------------------|--------------------------------|--|--|---------------------------------------|--|------------------------|-------------------|
| Mandigers 2019       |                                         | 14 ECMO Haemorrhage<br>1 Control Haemorrhage                                                                                 | 2 ECMO Intracranial bleeding                                                                                 |                                |  |  | 5 ECMO Infectious complications       |  |                        |                   |
| Miyazaki 2019        |                                         | 1 puncture site pseudoaneurysm<br>1 puncture site haematoma                                                                  | 1 Neurological                                                                                               |                                |  |  |                                       |  |                        |                   |
| Oh 2019              |                                         | 9 Haemorrhage                                                                                                                | 1 Neurological                                                                                               |                                |  |  |                                       |  | 1 Arterial Ischaemia   |                   |
| Kaese 2020           | 2 Mechanical                            | 4 Haemorrhage                                                                                                                |                                                                                                              |                                |  |  |                                       |  | 1 compartment syndrome |                   |
| Sertic 2020          | 12 Mechanical                           | 14 Haemorrhagic                                                                                                              | 13 Neurological                                                                                              | 11 Renal                       |  |  | 3 Infectious                          |  | 4 Limb                 |                   |
| Giraud 2021          |                                         | ECMO only: 1<br>ECMO + thromblysis: 17                                                                                       | ECMO only: stroke (2) Anoxic encephalopathy (4)<br>ECMO + thromblysis: stroke (2) Anoxic encephalopathy (10) |                                |  |  | ECMO only: 1<br>ECMO + thromblysis: 2 |  |                        |                   |
| Guliani 2021         |                                         | 1 vascular injury<br>5 bleeding requiring transfusion                                                                        | 1 stroke                                                                                                     | 1 AKI requiring dialysis       |  |  |                                       |  |                        |                   |
| Goldberg 2021        |                                         | ECMO first: 0<br>SE only: 1 reop for bleeding<br><br>16 ECMO requiring blood transfusion<br>9 non-ECMO requiring transfusion | ECMO first: 1 stroke<br>SE only: 1 stroke                                                                    | 7 RRT<br>ECMO<br>1 RRT nonECMO |  |  |                                       |  |                        |                   |
| Hockstein 2021       | 4 distal perfusion cannula dislodgement | 3 Arterial injury<br>1 Pseudoaneurysm<br>2 Haemorrhage                                                                       | 4 Stroke                                                                                                     |                                |  |  |                                       |  |                        | 3 visceral injury |
| Lin 2021             |                                         | 4 major bleeding                                                                                                             |                                                                                                              |                                |  |  |                                       |  |                        |                   |
| Martinez-Solano 2021 | Complications not reported              |                                                                                                                              |                                                                                                              |                                |  |  |                                       |  |                        |                   |
| Prasad 2021          |                                         | Major bleeding in:<br>11 with systemic thrombolysis<br>17 without systemic thrombolysis                                      |                                                                                                              |                                |  |  |                                       |  |                        |                   |
| Stadlbauer 2021      | Complications not reported              |                                                                                                                              |                                                                                                              |                                |  |  |                                       |  |                        |                   |
| Stein 2021           | Complications not reported              |                                                                                                                              |                                                                                                              |                                |  |  |                                       |  |                        |                   |

|                |                                                        |                                                                                                       |                                                          |                                                            |  |                                                                        |              |  |  |                              |
|----------------|--------------------------------------------------------|-------------------------------------------------------------------------------------------------------|----------------------------------------------------------|------------------------------------------------------------|--|------------------------------------------------------------------------|--------------|--|--|------------------------------|
| Dumantepe 2022 | 2 surgical cannula-related wound-infection debridement | 7 GUSTO<2 requiring blood transfusion                                                                 | 3 ischaemic stroke<br>1 hypoxic-ischaemic encephalopathy | 4 AKI requiring RRT<br>2 requiring dialysis post-discharge |  |                                                                        |              |  |  |                              |
| Hobohm 2022    |                                                        |                                                                                                       | ECMO: 108 ICH<br>Control: 6953 ICH                       |                                                            |  | 1119 Pneumonia<br>517 ARDS<br>151 Pneumothorax<br>87 Haemopneumothorax |              |  |  |                              |
| Jang 2022      |                                                        | 7 bleeding<br>1 pseudoaneurysm requiring surgical management<br>4 ECMO catheter insertion-site oozing |                                                          |                                                            |  |                                                                        |              |  |  |                              |
| Ltaief 2022    |                                                        | 13 massive bleeding                                                                                   | 7 anoxic encephalopathy                                  | 8 acute renal failure                                      |  |                                                                        | 4 Infectious |  |  |                              |
| Mously 2022    | Complications not reported                             |                                                                                                       |                                                          |                                                            |  |                                                                        |              |  |  |                              |
| Tsai 2022      |                                                        | 13 major bleeding                                                                                     | 13 severe neurologic complications                       | 11 severe kidney injury                                    |  |                                                                        |              |  |  | 8 ECMO-related complications |

Abbreviations: ARDS: Acute respiratory distress syndrome, BGIT: Bleeding of the gastrointestinal tract, ECMO: Extracorporeal membrane oxygenation, HIT: Heparin-induced thrombocytopenia, ICH: Intracranial haemorrhage, MOF: Multiorgan failure, RRT: Renal replacement therapy
